# Supplementary material for: Modelling Shifts and Contraction of Seed Zones in Two Mexican Pine Species by Using Molecular Markers
Source: MDPI journal article supplement (doi:10.3390/f12050570), 2021-05-01
Supplement: s1 [file s1]

## Supplementary material

### Modelling shifts and contraction of seed zones in two Mexican pine species by using molecular markers

Supplementary Table S1. Descriptive statistics for the 21 climatic variables of the two pine species under study, SD = standard deviation, N = 50.

| Variable | <i>Pinus arizonica</i> |        |        |       | <i>Pinus durangensis</i> |        |        |       |
|----------|------------------------|--------|--------|-------|--------------------------|--------|--------|-------|
|          | Mean                   | Min    | Max    | SD    | Mean                     | Min    | Max    | SD    |
| MAT      | 9.9                    | 8.3    | 11.2   | 0.8   | 10.9                     | 9.2    | 15.6   | 1.4   |
| MAP      | 867.3                  | 683.0  | 1217.0 | 144.4 | 1009.1                   | 729.0  | 1318.0 | 173.3 |
| GSP      | 640.8                  | 541.0  | 891.0  | 87.8  | 723.4                    | 520.0  | 949.0  | 127.3 |
| MTCM     | 4.3                    | 2.3    | 5.6    | 0.9   | 5.2                      | 3.1    | 9.4    | 1.4   |
| MMIN     | -5.3                   | -6.8   | -4.2   | 0.7   | -4.1                     | -5.9   | 0.5    | 1.4   |
| MTWM     | 14.9                   | 12.6   | 16.8   | 1.1   | 16.2                     | 13.8   | 21.1   | 1.8   |
| MMAX     | 24.2                   | 22.2   | 26.0   | 1.0   | 25.5                     | 23.4   | 30.5   | 2.0   |
| SDAY     | 158.2                  | 144.0  | 178.0  | 6.6   | 151.6                    | 109.0  | 167.0  | 11.4  |
| FDAY     | 269.2                  | 251.0  | 279.0  | 9.3   | 281.0                    | 257.0  | 313.0  | 12.5  |
| FFP      | 112.7                  | 78.0   | 134.0  | 17.8  | 134.4                    | 89.0   | 202.0  | 24.9  |
| DD5      | 2007.2                 | 1529.0 | 2387.0 | 222.6 | 2336.4                   | 1852.0 | 3883.0 | 446.1 |
| AAI      | 0.05                   | 0.04   | 0.07   | 0.01  | 0.05                     | 0.04   | 0.07   | 0.01  |
| GSDD5    | 1048.0                 | 538.0  | 1356.0 | 226.3 | 1380.4                   | 806.0  | 2869.0 | 437.6 |
| D100     | 63.6                   | 49.0   | 90.0   | 11.0  | 55.8                     | 21.0   | 82.0   | 13.5  |
| DD0      | 33.5                   | 10.0   | 91.0   | 21.4  | 21.7                     | 0.0    | 66.0   | 18.2  |
| MMINDD0  | 933.6                  | 797.0  | 1193.0 | 107.4 | 783.1                    | 230.0  | 1111.0 | 175.8 |
| SMRPB    | 4.7                    | 4.0    | 6.1    | 0.7   | 5.0                      | 4.2    | 6.8    | 0.8   |
| SMRSPRPB | 12.8                   | 10.9   | 14.8   | 1.3   | 14.3                     | 11.7   | 22.2   | 2.5   |
| SPRP     | 30.8                   | 27.0   | 42.0   | 3.3   | 32.3                     | 22.0   | 42.0   | 5.6   |
| SMRP     | 395.2                  | 318.0  | 525.0  | 65.1  | 455.0                    | 339.0  | 563.0  | 75.9  |
| WINP     | 157.3                  | 94.0   | 230.0  | 46.6  | 199.8                    | 117.0  | 274.0  | 44.0  |

Note= MAT = Mean annual temperature (°C), MAP = Mean annual precipitation (mm), GSP = Growing season precipitation (April-September) (mm), MTCM = Mean temperature in the coldest month (°C), MMIN = Minimum temperature in the coldest month (°C), MTWM = Mean temperature in the warmest month (°C), MMAX = Maximum temperature in the warmest month (°C), SDAY = Julian date of the last freezing date of spring, FDAY = Julian date of the first freezing date of autumn, FFP = Length of the Frost-free period (Days), DD5 = Degree days > 5°C (based on mean monthly temperature, degree-days), AAI = Annual aridity index [dd5/0.5mm], GSDD5 = Degree days > 5°C accumulated within the frost-free period (degree-days), D100 = Julian date when the sum of degree days >5°C reaches 100, DD0 = Degree-days < 0°C (based on mean monthly temperature, degree-days), MMINDD0 = Degree-days < 0°C (based on mean minimum monthly temperature, degree-days), SMRPB = Summer precipitation balance: (Jul+Aug+Sep)/(Apr+May+Jun), SMRSPRPB = Summer Spring precipitation balance: (Jul+Aug)/(Apr+May), SPRP = Spring precipitation (Apr+May) (mm), SMRP = Summer precipitation (Jul+Aug) (mm) and WINP = Winter precipitation (Nov+Dec+Jan+Feb) (mm).

Supplementary Table S2. Descriptive statistics for the 25 soil variables of the two pine species under study, SD = standard deviation, N = 50.

| Variable                | <i>P. arizonica</i> |       |        |       | <i>P. durangensis</i> |       |        |        |
|-------------------------|---------------------|-------|--------|-------|-----------------------|-------|--------|--------|
|                         | Mean                | Min   | Max    | SD    | Mean                  | Min   | Max    | SD     |
| SAL (dS/m)              | 0.3                 | 0.1   | 0.8    | 0.2   | 0.3                   | 0.1   | 1.6    | 0.3    |
| NO <sub>3</sub> (kg/ha) | 57.5                | 9.6   | 164.1  | 54.8  | 29.2                  | 9.7   | 165.2  | 30.5   |
| P (ppm)                 | 16.2                | 1.8   | 56.1   | 15.5  | 7.7                   | 1.1   | 32.3   | 8.6    |
| OM (%)                  | 9.2                 | 1.2   | 19.4   | 5.0   | 9.9                   | 3.0   | 20.5   | 5.1    |
| Sat (%)                 | 68.6                | 38.0  | 117.0  | 18.3  | 71.4                  | 45.0  | 99.0   | 15.4   |
| Sand (%)                | 62.7                | 40.4  | 78.4   | 8.5   | 65.0                  | 54.4  | 74.4   | 6.1    |
| Silt (%)                | 26.2                | 11.8  | 45.8   | 7.7   | 24.0                  | 15.8  | 33.8   | 4.8    |
| Clay (%)                | 11.2                | 5.7   | 15.7   | 2.6   | 11.0                  | 5.7   | 19.7   | 3.7    |
| pH                      | 5.1                 | 4.6   | 5.6    | 0.3   | 5.1                   | 4.6   | 5.5    | 0.3    |
| Ca (ppm)                | 1702.4              | 708.5 | 2967.3 | 595.8 | 1914.5                | 471.3 | 6321.3 | 1119.0 |
| Mg (ppm)                | 211.3               | 61.8  | 611.0  | 127.8 | 309.7                 | 71.5  | 822.3  | 210.2  |
| Na (ppm)                | 64.7                | 43.5  | 97.0   | 16.7  | 83.2                  | 37.5  | 401.5  | 69.8   |
| K (ppm)                 | 573.7               | 226.0 | 959.0  | 194.6 | 600.9                 | 275.5 | 1327.5 | 239.1  |
| Fe (ppm)                | 61.2                | 23.0  | 104.4  | 15.5  | 57.4                  | 30.7  | 75.3   | 13.7   |
| Zn (ppm)                | 2.8                 | 0.2   | 5.4    | 1.6   | 2.2                   | 0.2   | 6.7    | 1.9    |
| Mn (ppm)                | 51.2                | 3.5   | 90.9   | 29.3  | 44.6                  | 2.9   | 105.0  | 32.6   |
| Cu (ppm)                | 0.4                 | 0.2   | 0.9    | 0.2   | 0.4                   | 0.2   | 0.8    | 0.2    |
| O.B. (%)                | 6.9                 | 6.1   | 7.1    | 0.4   | 6.9                   | 6.3   | 7.1    | 0.3    |
| H (%)                   | 28.1                | 20.6  | 35.9   | 4.5   | 29.0                  | 22.1  | 35.4   | 4.5    |
| Ca (%)                  | 45.9                | 35.6  | 54.2   | 4.7   | 43.1                  | 30.1  | 54.3   | 6.3    |
| Mg (%)                  | 9.1                 | 5.1   | 16.6   | 2.9   | 11.1                  | 4.5   | 21.1   | 3.8    |
| K (%)                   | 8.3                 | 4.7   | 19.6   | 3.0   | 8.1                   | 3.1   | 24.1   | 4.3    |
| Na (%)                  | 1.7                 | 0.6   | 4.0    | 0.7   | 1.8                   | 0.7   | 6.8    | 1.2    |
| CEC                     | 18.5                | 7.5   | 31.7   | 6.2   | 22.0                  | 7.0   | 58.9   | 10.9   |
| HC (cm/h)               | 25.7                | 2.8   | 50.4   | 12.4  | 21.0                  | 2.0   | 49.8   | 13.2   |

Note = SAL = Salinity, NO<sub>3</sub> = Nitrates, P = Phosphorus, OM = Organic material, Sat = Water saturation, Ca = Calcium, Mg = Magnesium, Na = Sodium, K = Potassium, Fe = Iron, Zn = Zinc, Mn = Manganese, Cu = Copper, O.B.CEC = Rel. Proportion of other bases in the cation exchange capacity (CEC; meq/100g soil), HCEC = Relative proportion of hydrogen in CEC, CaCEC = Relative proportion in percentage of Ca in CEC, MgCEC = Relative proportion (%) of Mg in CEC, KCEC = Relative proportion in percentage of K in CEC, NaCEC = Relative proportion (%) of Na in , CEC = cation exchange capacity (CEC; meq/100g soil) and HC = Hydraulic conductivity.

Supplementary Table S3a. Locations of the seed stands under study of the species *Pinus arizonica*.

| Species             | Stands | Code | Location              | Municipality      | States    | Latitude (N) | Longitude (W) | Elevation (m) | Cluster | Mean distance to the next tree (m) |
|---------------------|--------|------|-----------------------|-------------------|-----------|--------------|---------------|---------------|---------|------------------------------------|
| <i>P. arizonica</i> | 17     | PA3  | P.P Porvenir          | Guachochi         | Chihuahua | 26°44'26.41" | 107°15'11.94" | 2,587         | 1       | 56                                 |
|                     | 4      | AM   | El Muertesito         | Guadalupe y Calvo | Chihuahua | 26°1'37.9"   | 106°2'38.1"   | 2,801         | 1       | 140                                |
|                     | 3      | AIC  | Rancho el Indio       | Guadalupe y Calvo | Chihuahua | 26°2'29.6"   | 106°46'3"     | 2,721         | 1       | 84                                 |
|                     | 1      | AG   | Entronque de Gallinas | Guadalupe y Calvo | Chihuahua | 26°4'15.2"   | 106°54'26.4"  | 2,956         | 1       | 116                                |
|                     | 6      | BT   | Bajío del Cochi       | Teomohachi        | Chihuahua | 28°37'22.95" | 108°15'54.45" | 2,398         | 1       | 68                                 |
|                     | 9      | ET   | Toril                 | San Dimas         | Durango   | 24°26'59.57" | 105°56'26.03" | 2,760         | 1       | 76                                 |
|                     | 14     | PA   | El Girón              | Tepehunes         | Durango   | 25°5'56.19"  | 105°51'12.85" | 2,913         | 1       | 71                                 |
|                     | 8      | CA1  | La Cebadilla          | Balleza           | Chihuahua | 26°10'10.16" | 106°20'54.5"  | 2,670         | 2       | 80                                 |
|                     | 15     | PA1  | El Embudo             | Balleza           | Chihuahua | 26°20'5.9"   | 106°19'34.5"  | 2,499         | 2       | 120                                |
|                     | 11     | J3   | Entronque Jacales     | Balleza           | Chihuahua | 26°21'28.4"  | 106°24'57.9"  | 2,588         | 2       | 65                                 |
|                     | 16     | PA2  | La Ultima Agua        | Balleza           | Chihuahua | 26°21'36.7"  | 106°20'4.7"   | 2,700         | 2       | 110                                |
|                     | 20     | PC1  | Cebollas (Pinole)     | Balleza           | Chihuahua | 26°32'16.8"  | 106°28'31.8"  | 2,657         | 2       | 67                                 |
|                     | 19     | PB   | El Bigueño            | Balleza           | Chihuahua | 26°33'42.7"  | 106°25'25"    | 2,480         | 2       | 67                                 |
|                     | 10     | J1   | La Tetona             | Balleza           | Chihuahua | 26°36'54.4"  | 106°32'32.9"  | 2,569         | 2       | 73                                 |
|                     | 5      | AO   | Mesa del Ojito        | Guadalupe y Calvo | Chihuahua | 26°10'22.2"  | 106°38'6.8"   | 2,684         | 2       | 129                                |
|                     | 25     | XX   | EL Guardaganado       | Guanacevi         | Durango   | 26°10'35.76" | 106°20'52.16" | 3,062         | 2       | 82                                 |
|                     | 24     | TG   | Tierras de Genaro     | Guanacevi         | Durango   | 26°10'49.55" | 106°21'8.21"  | 2,675         | 2       | 67                                 |
|                     | 23     | TC   | La Torre              | Guanacevi         | Durango   | 26°10'57.23" | 106°20'28.53" | 2,948         | 2       | 66                                 |
|                     | 7      | CA   | Los Magueyes          | Guanacevi         | Durango   | 26°15'9.3"   | 106°24'10.5"  | 2,486         | 2       | 83                                 |
|                     | 2      | AGLL | Gallina               | Guachochi         | Chihuahua | 26°44'40.34" | 107°10'6.09"  | 2,420         | 3       | 69                                 |
|                     | 13     | MJ   | Mesa de Joya          | Guachochi         | Chihuahua | 26°48'22.98" | 107°2'18.94"  | 2,724         | 3       | 80                                 |
|                     | 12     | MC   | Mesa Rancho Mario     | Madera            | Chihuahua | 29°13'11.8"  | 108°13'11.67" | 2,552         | 3       | 63                                 |
|                     | 22     | PS   | Mesa de Seis          | Madera            | Chihuahua | 29°22'27.42" | 108°11'31.33" | 2,571         | 3       | 58                                 |
|                     | 18     | PACB | Ciénega Blanca        | Teomohachi        | Chihuahua | 28°42'38.63" | 108°15'49.49" | 2,669         | 3       | 64                                 |
|                     | 21     | PCT  | Puerto Grande         | Teomohachi        | Chihuahua | 28°43'49.22" | 108°17'59.76" | 2,629         | 3       | 48                                 |

Supplementary Table S3b. Locations of the seed stands under study of the species *Pinus durangensis*.

| Species               | Stands | Code | Location              | Municipality         | States    | Latitude (N) | Longitude (W) | Elevation (m) | Cluster | Mean distance to the next tree (m) |
|-----------------------|--------|------|-----------------------|----------------------|-----------|--------------|---------------|---------------|---------|------------------------------------|
| <i>P. durangensis</i> | 2      | CD   | La Cebadilla          | Balleza              | Chihuahua | 26°15'9.3"   | 106°24'10.5"  | 2,595         | 1       | 57                                 |
|                       | 18     | PD1  | Los Ángeles de Arriba | Balleza              | Chihuahua | 26°25'17.3"  | 106°31'36.7"  | 2,768         | 1       | 72                                 |
|                       | 7      | EG   | Granizo               | Guachochi            | Chihuahua | 26°41'19.86" | 107°15'19.99" | 2,801         | 1       | 55                                 |
|                       | 24     | PPD  | Porvenir              | Guachochi            | Chihuahua | 26°46'40.73" | 107°15'8.91"  | 2,450         | 1       | 63                                 |
|                       | 9      | H2   | Alto del Águila       | Guadalupe y Calvo    | Chihuahua | 25°47'14.8"  | 106°41'14.4"  | 2,212         | 1       | 66                                 |
|                       | 6      | DP   | El Panteón            | Guadalupe y Calvo    | Chihuahua | 26°1'12.6"   | 106°54'32"    | 2,635         | 1       | 143                                |
|                       | 20     | PDC  | El Pinito             | Guadalupe y Calvo    | Chihuahua | 26°4'40.2"   | 106°59'20.9"  | 2,444         | 1       | 71                                 |
|                       | 5      | DC   | Parque de Beis Bol    | Guadalupe y Calvo    | Chihuahua | 26°5'12.9"   | 106°47'36.8"  | 2,217         | 1       | 67                                 |
|                       | 15     | MA   | Mesa de Carrera       | Ocampo               | Chihuahua | 28°10'30.76" | 108°16'1.23"  | 2,231         | 1       | 57                                 |
|                       | 16     | OC   | Mesa del Pinole       | Ocampo               | Chihuahua | 28°13'33.37" | 108°17'52.19" | 2,439         | 1       | 56                                 |
|                       | 25     | SMD  | Mesa de Escorpiones   | Otáez                | Durango   | 24°44'10.32" | 105°56'43.7"  | 2,578         | 1       | 102                                |
|                       | 1      | CC   | Cordón del 45         | Teomohachi           | Chihuahua | 28°44'18.43" | 108°16'18.57" | 2,385         | 1       | 56                                 |
|                       | 19     | PD2  | Mesa de Arturo        | Urique               | Chihuahua | 27°12'59.21" | 107°59'53.4"  | 2,410         | 1       | 99                                 |
|                       | 3      | CHD  | Mesa Huicochi (churo) | Urique               | Chihuahua | 27°25'1.69"  | 107°57'1.12"  | 2,647         | 1       | 81                                 |
|                       | 21     | PDN  | Panteón               | Guachochi            | Chihuahua | 27°15'35.9"  | 107°27'15.8"  | 2,381         | 2       | 56                                 |
|                       | 4      | CM   | Ojito                 | Madera               | Chihuahua | 29°1'9.69"   | 108°19'54.86" | 2,441         | 2       | 51                                 |
|                       | 12     | LD   | La Daga               | Madera               | Chihuahua | 29°29'47.53" | 108°18'59.45" | 2,381         | 2       | 55                                 |
|                       | 13     | LND  | Mesa de las Garzas    | Madera               | Chihuahua | 29°35'55.43" | 108°26'12.69" | 2,516         | 2       | 57                                 |
|                       | 14     | LP   | La Piedrera           | Madera               | Chihuahua | 29°40'59.13" | 108°26'36.78" | 2,701         | 2       | 115                                |
|                       | 11     | LCQ  | La Cruz Quemada       | Urique               | Chihuahua | 27°12'17.17" | 108°0'28.72"  | 2,543         | 2       | 79                                 |
|                       | 17     | PD   | Puerto la Trampa      | San Dimas            | Durango   | 24°23'8.29"  | 106°2'56.9"   | 2,630         | 3       | 78                                 |
|                       | 8      | ESF  | El Cuadro             | San Dimas            | Durango   | 24°26'8.37"  | 106°3'5.24"   | 2,219         | 3       | 70                                 |
|                       | 23     | PL   | La Pista              | San Dimas            | Durango   | 24°27'19.26" | 106°8'8.06"   | 2,495         | 3       | 115                                |
|                       | 10     | JP   | La Joya               | Santiago Papasquiaro | Durango   | 25°0'10.68"  | 106°9'47.04"  | 2,438         | 3       | 73                                 |
|                       | 22     | PDS  | La Soledad            | Santiago Papasquiaro | Durango   | 25°0'7.41"   | 106°10'26.42" | 2,405         | 3       | 90                                 |

Supplementary Table S4. Outlier loci by AFLP found for the two *Pinus* species studied by using BayeScan (posterior probability > 0.99, false discovery rates < 0.01), and the measure of genetic differentiation  $\delta$  ( $p < 0.0001$ ).

| Pine species          | BayeScan and genetic differentiation $\delta$                                                                                                                                          |
|-----------------------|----------------------------------------------------------------------------------------------------------------------------------------------------------------------------------------|
| <i>P. arizonica</i>   | 75,76,86,87,91,92,102,147,164,174,186,189,190,194,207,208,209,211,212,214,225,240,257,260,264,268,277,282,286,298,308,311,312,314,318,339,349,351,360,407,424,425                      |
| <i>P. durangensis</i> | 75,76,86,87,92,117,155,163,180,181,189,190,194,208,209,211,214,215,236,240,257,260,264,265,268,274,277,282,286,298,308,311,312,318,333,335,339,342,349,352,360,381,406,407,416,424,425 |

Note:  $\delta$  detected more outlier loci of AFLP than by using BayeScan.

Supplementary Table S5. Descriptive statistics of the climatic variables implemented in the *Pinus arizonica* distribution model; SD= standard deviation.

| Abbreviation | Variable                                                          | Unit      | Min          | Max           | Mean         | SD           |
|--------------|-------------------------------------------------------------------|-----------|--------------|---------------|--------------|--------------|
| BIO01        | Annual Mean Temperature                                           | °C        | 9.4          | 24.6          | 15.1         | 3.0          |
| <b>BIO02</b> | <b>Mean Diurnal Range (Mean of monthly (max temp - min temp))</b> | °C        | <b>11.1</b>  | <b>19.7</b>   | <b>16.2</b>  | <b>2.0</b>   |
| BIO03        | Isothermality (BIO2/BIO7) (* 100)                                 | °C        | 4.3          | 7.1           | 5.8          | 0.4          |
| <b>BIO04</b> | <b>Temperature Seasonality (standard deviation *100)</b>          | °C        | <b>225.2</b> | <b>762.3</b>  | <b>396.0</b> | <b>102.4</b> |
| BIO05        | Max Temperature of Warmest Month                                  | °C        | 20.8         | 38.4          | 28.6         | 3.1          |
| BIO06        | Min Temperature of Coldest Month                                  | °C        | -6.9         | 14.0          | 0.9          | 4.1          |
| BIO07        | Temperature Annual Range (BIO5-BIO6)                              | °C        | 18.7         | 38.6          | 27.7         | 4.2          |
| BIO08        | Mean Temperature of Wettest Quarter                               | °C        | 13.2         | 28.4          | 19.1         | 2.8          |
| BIO09        | Mean Temperature of Driest Quarter                                | °C        | 6.5          | 24.6          | 14.2         | 3.4          |
| <b>BIO10</b> | <b>Mean Temperature of Warmest Quarter</b>                        | °C        | <b>13.6</b>  | <b>29.0</b>   | <b>19.8</b>  | <b>2.9</b>   |
| <b>BIO11</b> | <b>Mean Temperature of Coldest Quarter</b>                        | °C        | <b>2.5</b>   | <b>20.9</b>   | <b>9.8</b>   | <b>3.6</b>   |
| <b>BIO12</b> | <b>Annual Precipitation</b>                                       | <b>mm</b> | <b>209.0</b> | <b>1548.0</b> | <b>789.7</b> | <b>231.0</b> |
| BIO13        | Precipitation of Wettest Month                                    | mm        | 36.0         | 482.0         | 195.2        | 56.9         |
| <b>BIO14</b> | <b>Precipitation of Driest Month</b>                              | <b>mm</b> | <b>0.0</b>   | <b>22.0</b>   | <b>8.3</b>   | <b>3.8</b>   |
| <b>BIO15</b> | <b>Precipitation Seasonality (Coefficient of Variation)</b>       | <b>%</b>  | <b>44.0</b>  | <b>126.0</b>  | <b>94.6</b>  | <b>11.0</b>  |
| BIO16        | Precipitation of Wettest Quarter                                  | mm        | 107.0        | 1200.0        | 496.5        | 148.6        |
| BIO17        | Precipitation of Driest Quarter                                   | mm        | 9.0          | 76.0          | 37.5         | 14.3         |
| <b>BIO18</b> | <b>Precipitation of Warmest Quarter</b>                           | <b>mm</b> | <b>94.0</b>  | <b>1012.0</b> | <b>407.0</b> | <b>132.0</b> |
| <b>BIO19</b> | <b>Precipitation of Coldest Quarter</b>                           | <b>mm</b> | <b>18.0</b>  | <b>272.0</b>  | <b>100.1</b> | <b>45.8</b>  |

NOTE: Variables in bold were selected for the *Pinus arizonica* distribution model.

Supplementary Table S6. Descriptive statistics of the topography variables implemented in the *Pinus arizonica* distribution model. SD= standard deviation.

| Abbreviation | Variable                   | Unit     | Min         | Max        | Mean       | SD         |
|--------------|----------------------------|----------|-------------|------------|------------|------------|
| ASP          | Aspect                     | %        | -1.0        | 359.8      | 183.1      | 102.5      |
| CUR          | Curvature                  | %        | -1.4        | 1.9        | 0.0        | 0.2        |
| PLC          | Plan curvature             | %        | -0.7        | 0.9        | 0.0        | 0.1        |
| PRC          | Profile curvature          | %        | -0.9        | 0.8        | 0.0        | 0.1        |
| SLP          | Slope (degrees)            | %        | 0.0         | 55.6       | 11.3       | 7.8        |
| <b>TSI</b>   | <b>Terrain shape index</b> | <b>%</b> | <b>-0.9</b> | <b>1.0</b> | <b>0.0</b> | <b>0.1</b> |
| WI           | Wetness index              | %        | 0.0         | 22.9       | 12.2       | 1.7        |

NOTE: Variables in bold were selected for the *P. arizonica* distribution model.

Supplementary Table S7a. Descriptive statistics of the soil variables implemented in the *Pinus arizonica* distribution model; SD= standard deviation.

| Abbreviation      | Variable                                                  | Unit      | Min       | Max         | Mean         | SD           |
|-------------------|-----------------------------------------------------------|-----------|-----------|-------------|--------------|--------------|
| <b>GEO</b>        | <b>Geology_inegi</b>                                      | -         | <b>2</b>  | <b>27</b>   | <b>25.4</b>  | <b>4.5</b>   |
| <b>LITHO</b>      | <b>Lithostratigraphy_inegi</b>                            | -         | <b>1</b>  | <b>37</b>   | <b>9.6</b>   | <b>2.5</b>   |
| <b>BDRICM</b>     | <b>Depth to bedrock (R horizon) up to 200 cm</b>          | <b>cm</b> | <b>26</b> | <b>200</b>  | <b>96.8</b>  | <b>25.6</b>  |
| BDRLOG            | Predicted probability of occurrence (0-100%) of R horizon | %         | 4         | 100         | 72.2         | 11.2         |
| <b>BDTICM</b>     | <b>Absolute depth to bedrock</b>                          | <b>cm</b> | <b>0</b>  | <b>9807</b> | <b>141.8</b> | <b>241.6</b> |
| BLDFIE-sl1        | Bulk density (fine earth)                                 | kg/m3     | 1032      | 1541        | 1319.7       | 73.0         |
| BLDFIE-sl2        | Bulk density (fine earth)                                 | kg/m3     | 994       | 1514        | 1271.7       | 75.1         |
| BLDFIE-sl3        | Bulk density (fine earth)                                 | kg/m3     | 1121      | 1526        | 1322.3       | 60.5         |
| BLDFIE-sl4        | Bulk density (fine earth)                                 | kg/m3     | 1199      | 1571        | 1371.3       | 61.5         |
| BLDFIE-sl5        | Bulk density (fine earth)                                 | kg/m3     | 1254      | 1639        | 1433.6       | 65.1         |
| BLDFIE-sl6        | Bulk density (fine earth)                                 | kg/m3     | 1248      | 1632        | 1454.2       | 61.3         |
| BLDFIE-sl7        | Bulk density (fine earth)                                 | kg/m3     | 1249      | 1630        | 1451.9       | 59.5         |
| CECSOL-sl1        | Cation exchange capacity of soil                          | cmol/kg   | 14        | 42          | 24.1         | 4.2          |
| CECSOL-sl2        | Cation exchange capacity of soil                          | cmol/kg   | 13        | 39          | 22.6         | 4.0          |
| CECSOL-sl3        | Cation exchange capacity of soil                          | cmol/kg   | 12        | 39          | 22.3         | 4.0          |
| CECSOL-sl4        | Cation exchange capacity of soil                          | cmol/kg   | 12        | 40          | 22.4         | 3.9          |
| CECSOL-sl5        | Cation exchange capacity of soil                          | cmol/kg   | 12        | 40          | 22.7         | 3.7          |
| CECSOL-sl6        | Cation exchange capacity of soil                          | cmol/kg   | 13        | 40          | 22.9         | 3.6          |
| CECSOL-sl7        | Cation exchange capacity of soil                          | cmol/kg   | 13        | 40          | 23.1         | 3.8          |
| CLYPPT-sl1        | Clay content (0-2 micro meter) mass fraction              | %         | 31        | 58          | 46.9         | 3.5          |
| CLYPPT-sl2        | Clay content (0-2 micro meter) mass fraction              | %         | 32        | 60          | 47.0         | 3.7          |
| CLYPPT-sl3        | Clay content (0-2 micro meter) mass fraction              | %         | 32        | 61          | 46.8         | 3.5          |
| CLYPPT-sl4        | Clay content (0-2 micro meter) mass fraction              | %         | 34        | 60          | 45.9         | 3.3          |
| <b>CLYPPT-sl5</b> | <b>Clay content (0-2 micro meter) mass fraction</b>       | <b>%</b>  | <b>34</b> | <b>60</b>   | <b>45.2</b>  | <b>3.0</b>   |
| CLYPPT-sl6        | Clay content (0-2 micro meter) mass fraction              | %         | 34        | 59          | 44.9         | 2.9          |
| CLYPPT-sl7        | Clay content (0-2 micro meter) mass fraction              | %         | 32        | 57          | 44.0         | 2.8          |
| CRFVOL-sl1        | Coarse fragments volumetric                               | %         | 7         | 37          | 22.8         | 3.3          |
| CRFVOL-sl2        | Coarse fragments volumetric                               | %         | 6         | 35          | 21.9         | 3.1          |
| <b>CRFVOL-sl3</b> | <b>Coarse fragments volumetric</b>                        | <b>%</b>  | <b>7</b>  | <b>36</b>   | <b>23.0</b>  | <b>3.1</b>   |
| CRFVOL-sl4        | Coarse fragments volumetric                               | %         | 7         | 37          | 24.1         | 3.1          |
| CRFVOL-sl5        | Coarse fragments volumetric                               | %         | 8         | 39          | 25.5         | 3.1          |
| CRFVOL-sl6        | Coarse fragments volumetric                               | %         | 10        | 41          | 26.7         | 3.1          |
| CRFVOL-sl7        | Coarse fragments volumetric                               | %         | 11        | 41          | 27.9         | 3.1          |
| OCSTHA-sd1        | Soil organic carbon stock                                 | t ha      | 0         | 60          | 13.7         | 11.2         |
| OCSTHA-sd2        | Soil organic carbon stock                                 | t ha      | 0         | 94          | 14.2         | 11.6         |
| OCSTHA-sd3        | Soil organic carbon stock                                 | t ha      | 0         | 133         | 13.2         | 11.3         |
| OCSTHA-sd4        | Soil organic carbon stock                                 | t ha      | 0         | 273         | 15.8         | 15.6         |
| OCSTHA-sd5        | Soil organic carbon stock                                 | t ha      | 0         | 366         | 5.8          | 9.2          |
| OCSTHA-sd6        | Soil organic carbon stock                                 | t ha      | 0         | 160         | 0.6          | 4.2          |

NOTE: Variables in bold were selected for the *P. arizonica* distribution model.

Supplementary Table S7b. Descriptive statistics of the soil variables implemented in the *Pinus arizonica* distribution model; SD= standard deviation.

| Abbreviation      | Variable                                          | Unit       | Min       | Max       | Mean        | SD         |
|-------------------|---------------------------------------------------|------------|-----------|-----------|-------------|------------|
| ORCDRC-sl1        | Soil organic carbon content (fine earth fraction) | g kg       | 6         | 152       | 57.4        | 18.5       |
| ORCDRC-sl2        | Soil organic carbon content (fine earth fraction) | g kg       | 5         | 113       | 26.9        | 8.1        |
| ORCDRC-sl3        | Soil organic carbon content (fine earth fraction) | g kg       | 5         | 94        | 17.8        | 4.4        |
| ORCDRC-sl4        | Soil organic carbon content (fine earth fraction) | g kg       | 2         | 92        | 10.2        | 3.4        |
| ORCDRC-sl5        | Soil organic carbon content (fine earth fraction) | g kg       | 1         | 88        | 7.4         | 2.9        |
| ORCDRC-sl6        | Soil organic carbon content (fine earth fraction) | g kg       | 0         | 89        | 6.7         | 2.8        |
| ORCDRC-sl7        | Soil organic carbon content (fine earth fraction) | g kg       | 0         | 89        | 6.6         | 2.8        |
| PHIHOX-sl1        | Soil pH x 10                                      | H2O        | 51        | 85        | 61.1        | 4.3        |
| PHIHOX-sl2        | Soil pH x 10                                      | H2O        | 51        | 85        | 60.7        | 4.4        |
| <b>PHIHOX-sl3</b> | <b>Soil pH x 10</b>                               | <b>H2O</b> | <b>51</b> | <b>85</b> | <b>60.8</b> | <b>4.5</b> |
| PHIHOX-sl4        | Soil pH x 10                                      | H2O        | 52        | 86        | 61.1        | 4.4        |
| PHIHOX-sl5        | Soil pH x 10                                      | H2O        | 53        | 87        | 61.9        | 4.7        |
| PHIHOX-sl6        | Soil pH x 10                                      | H2O        | 53        | 87        | 63.3        | 4.6        |
| PHIHOX-sl7        | Soil pH x 10                                      | H2O        | 53        | 88        | 63.9        | 4.6        |
| <b>PHIKCL-sl1</b> | <b>Soil pH x 10</b>                               | <b>KCl</b> | <b>41</b> | <b>75</b> | <b>54.2</b> | <b>5.5</b> |
| PHIKCL-sl2        | Soil pH x 10                                      | KCl        | 41        | 74        | 54.2        | 5.4        |
| PHIKCL-sl3        | Soil pH x 10                                      | KCl        | 42        | 74        | 54.0        | 5.3        |
| PHIKCL-sl4        | Soil pH x 10                                      | KCl        | 44        | 74        | 54.1        | 5.1        |
| PHIKCL-sl5        | Soil pH x 10                                      | KCl        | 44        | 75        | 54.6        | 5.1        |
| PHIKCL-sl6        | Soil pH x 10                                      | KCl        | 45        | 75        | 54.9        | 5.0        |
| PHIKCL-sl7        | Soil pH x 10                                      | KCl        | 45        | 76        | 55.3        | 5.1        |
| SLTPPT-sl1        | Silt content (2-50 micro meter)                   | %          | 12        | 36        | 26.2        | 2.9        |
| SLTPPT-sl2        | Silt content (2-50 micro meter)                   | %          | 12        | 37        | 26.4        | 2.8        |
| SLTPPT-sl3        | Silt content (2-50 micro meter)                   | %          | 11        | 36        | 26.1        | 2.8        |
| SLTPPT-sl4        | Silt content (2-50 micro meter)                   | %          | 11        | 35        | 25.3        | 2.9        |
| SLTPPT-sl5        | Silt content (2-50 micro meter)                   | %          | 11        | 34        | 24.7        | 2.6        |
| SLTPPT-sl6        | Silt content (2-50 micro meter)                   | %          | 12        | 33        | 24.1        | 2.4        |
| SLTPPT-sl7        | Silt content (2-50 micro meter)                   | %          | 12        | 33        | 24.0        | 2.3        |
| SNDPPT-sl1        | Sand content (50-2000 micro meter)                | %          | 19        | 41        | 27.1        | 2.3        |
| SNDPPT-sl2        | Sand content (50-2000 micro meter)                | %          | 20        | 42        | 26.7        | 2.5        |
| SNDPPT-sl3        | Sand content (50-2000 micro meter)                | %          | 20        | 43        | 27.3        | 2.7        |
| SNDPPT-sl4        | Sand content (50-2000 micro meter)                | %          | 20        | 43        | 28.9        | 2.9        |
| SNDPPT-sl5        | Sand content (50-2000 micro meter)                | %          | 21        | 44        | 30.2        | 2.8        |
| SNDPPT-sl6        | Sand content (50-2000 micro meter)                | %          | 21        | 45        | 31.1        | 2.7        |
| SNDPPT-sl7        | Sand content (50-2000 micro meter)                | %          | 22        | 44        | 32.2        | 2.5        |

NOTE: Variables in bold were selected for the *P. arizonica* distribution model.



Supplementary Table S8. Descriptive statistics of the climatic variables implemented in the *Pinus durangensis* distribution model; SD= standard deviation.

| Abbreviation | Variable                                                          | Unit      | Min          | Max           | Mean         | SD           |
|--------------|-------------------------------------------------------------------|-----------|--------------|---------------|--------------|--------------|
| BIO01        | Annual Mean Temperature                                           | °C        | 9.4          | 24.6          | 14.9         | 3.0          |
| <b>BIO02</b> | <b>Mean Diurnal Range (Mean of monthly (max temp - min temp))</b> | °C        | <b>11.1</b>  | <b>19.6</b>   | <b>16.2</b>  | <b>2.0</b>   |
| <b>BIO03</b> | <b>Isothermality (BIO2/BIO7) (* 100)</b>                          | °C        | <b>4.9</b>   | <b>6.5</b>    | <b>5.8</b>   | <b>0.3</b>   |
| <b>BIO04</b> | <b>Temperature Seasonality (standard deviation *100)</b>          | °C        | <b>225.2</b> | <b>650.7</b>  | <b>394.8</b> | <b>101.7</b> |
| BIO05        | Max Temperature of Warmest Month                                  | °C        | 20.8         | 38.4          | 28.5         | 3.1          |
| BIO06        | Min Temperature of Coldest Month                                  | °C        | -6.9         | 14.0          | 0.8          | 4.1          |
| <b>BIO07</b> | <b>Temperature Annual Range (BIO5-BIO6)</b>                       | °C        | <b>18.7</b>  | <b>36.2</b>   | <b>27.7</b>  | <b>4.2</b>   |
| BIO08        | Mean Temperature of Wettest Quarter                               | °C        | 13.2         | 28.2          | 18.9         | 2.8          |
| <b>BIO09</b> | <b>Mean Temperature of Driest Quarter</b>                         | °C        | <b>6.5</b>   | <b>24.6</b>   | <b>14.2</b>  | <b>3.4</b>   |
| BIO10        | Mean Temperature of Warmest Quarter                               | °C        | 13.6         | 28.9          | 19.6         | 2.8          |
| BIO11        | Mean Temperature of Coldest Quarter                               | °C        | 2.5          | 20.9          | 9.7          | 3.6          |
| BIO12        | Annual Precipitation                                              | mm        | 352.0        | 1548.0        | 806.4        | 220.6        |
| <b>BIO13</b> | <b>Precipitation of Wettest Month</b>                             | <b>mm</b> | <b>90.0</b>  | <b>482.0</b>  | <b>200.3</b> | <b>52.3</b>  |
| BIO14        | Precipitation of Driest Month                                     | mm        | 0.0          | 22.0          | 8.3          | 3.8          |
| <b>BIO15</b> | <b>Precipitation Seasonality (Coefficient of Variation)</b>       | <b>%</b>  | <b>74.0</b>  | <b>126.0</b>  | <b>95.8</b>  | <b>9.3</b>   |
| <b>BIO16</b> | <b>Precipitation of Wettest Quarter</b>                           | <b>mm</b> | <b>222.0</b> | <b>1200.0</b> | <b>509.5</b> | <b>137.4</b> |
| <b>BIO17</b> | <b>Precipitation of Driest Quarter</b>                            | <b>mm</b> | <b>9.0</b>   | <b>76.0</b>   | <b>37.6</b>  | <b>14.4</b>  |
| <b>BIO18</b> | <b>Precipitation of Warmest Quarter</b>                           | <b>mm</b> | <b>158.0</b> | <b>1012.0</b> | <b>417.5</b> | <b>124.5</b> |
| <b>BIO19</b> | <b>Precipitation of Coldest Quarter</b>                           | <b>mm</b> | <b>18.0</b>  | <b>272.0</b>  | <b>102.6</b> | <b>45.0</b>  |

NOTE: Variables in bold were selected for the *P. durangensis* distribution model.

Supplementary Table S9. Descriptive statistics of the topography variables implemented in the *Pinus durangensis* distribution model; SD= standard deviation.

| Abbreviation | Variable               | Unit     | Min        | Max         | Mean        | Sd         |
|--------------|------------------------|----------|------------|-------------|-------------|------------|
| ASP          | Aspect                 | %        | 0.0        | 359.8       | 184.1       | 102.1      |
| CU           | Curvature              | %        | -1.4       | 1.9         | 0.0         | 0.2        |
| PLC          | Plan curvature         | %        | -0.7       | 0.9         | 0.0         | 0.1        |
| PRC          | Profile curvature      | %        | -0.9       | 0.8         | 0.0         | 0.1        |
| <b>SLP</b>   | <b>Slope (degrees)</b> | <b>%</b> | <b>0.1</b> | <b>55.6</b> | <b>11.4</b> | <b>7.7</b> |
| TSI          | Terrain shape index    | %        | -0.9       | 1.0         | 0.0         | 0.1        |
| <b>WI</b>    | <b>Wetness index</b>   | <b>%</b> | <b>8.5</b> | <b>21.4</b> | <b>12.2</b> | <b>1.6</b> |

NOTE: Variables in bold were selected for the *P. durangensis* distribution model.

Supplementary Table S10a. Descriptive statistics of the soil variables implemented in the *Pinus durangensis* distribution model. SD= standard deviation.

| Abbreviation      | Variable                                                  | Unit           | Min         | Max         | Mean          | SD          |
|-------------------|-----------------------------------------------------------|----------------|-------------|-------------|---------------|-------------|
| <b>GEO</b>        | <b>Geology_INEGI</b>                                      | -              | <b>2</b>    | <b>27</b>   | <b>26.0</b>   | <b>3.4</b>  |
| LITHO             | Lithostratigraphy_INEGI                                   | -              | 1           | 32          | 9.6           | 2.2         |
| BDRICM            | Depth to bedrock (R horizon) up to 200 cm                 | cm             | 26          | 181         | 95.1          | 23.1        |
| BDRLOG            | Predicted probability of occurrence (0-100%) of R horizon | %              | 32          | 100         | 73.1          | 9.4         |
| BDTICM            | Absolute depth to bedrock                                 | cm             | 0           | 2424        | 131.4         | 162.8       |
| <b>BLDFIE-sl1</b> | <b>Bulk density (fine earth)</b>                          | <b>kg/m3</b>   | <b>1032</b> | <b>1517</b> | <b>1317.3</b> | <b>72.5</b> |
| BLDFIE-sl2        | Bulk density (fine earth)                                 | kg/m3          | 994         | 1473        | 1268.6        | 74.1        |
| BLDFIE-sl3        | Bulk density (fine earth)                                 | kg/m3          | 1121        | 1514        | 1320.0        | 60.0        |
| BLDFIE-sl4        | Bulk density (fine earth)                                 | kg/m3          | 1199        | 1571        | 1369.5        | 61.5        |
| BLDFIE-sl5        | Bulk density (fine earth)                                 | kg/m3          | 1254        | 1639        | 1432.5        | 65.6        |
| BLDFIE-sl6        | Bulk density (fine earth)                                 | kg/m3          | 1248        | 1632        | 1453.1        | 61.7        |
| BLDFIE-sl7        | Bulk density (fine earth)                                 | kg/m3          | 1249        | 1630        | 1450.3        | 59.7        |
| <b>CECSOL-sl1</b> | <b>Cation exchange capacity of soil</b>                   | <b>cmol/kg</b> | <b>14</b>   | <b>42</b>   | <b>24.0</b>   | <b>4.2</b>  |
| CECSOL-sl2        | Cation exchange capacity of soil                          | cmol/kg        | 14          | 37          | 22.5          | 4.0         |
| CECSOL-sl3        | Cation exchange capacity of soil                          | cmol/kg        | 12          | 37          | 22.2          | 3.9         |
| CECSOL-sl4        | Cation exchange capacity of soil                          | cmol/kg        | 12          | 37          | 22.3          | 3.8         |
| CECSOL-sl5        | Cation exchange capacity of soil                          | cmol/kg        | 12          | 37          | 22.6          | 3.7         |
| CECSOL-sl6        | Cation exchange capacity of soil                          | cmol/kg        | 13          | 37          | 22.8          | 3.6         |
| CECSOL-sl7        | Cation exchange capacity of soil                          | cmol/kg        | 13          | 39          | 23.0          | 3.8         |
| CLYPPT-sl1        | Clay content (0-2 micro meter) mass fraction              | %              | 37          | 58          | 47.2          | 3.1         |
| <b>CLYPPT-sl2</b> | <b>Clay content (0-2 micro meter) mass fraction</b>       | <b>%</b>       | <b>36</b>   | <b>60</b>   | <b>47.3</b>   | <b>3.3</b>  |
| CLYPPT-sl3        | Clay content (0-2 micro meter) mass fraction              | %              | 35          | 59          | 47.0          | 3.2         |
| CLYPPT-sl4        | Clay content (0-2 micro meter) mass fraction              | %              | 34          | 60          | 46.1          | 3.1         |
| CLYPPT-sl5        | Clay content (0-2 micro meter) mass fraction              | %              | 35          | 60          | 45.4          | 2.8         |
| CLYPPT-sl6        | Clay content (0-2 micro meter) mass fraction              | %              | 36          | 59          | 45.1          | 2.7         |
| CLYPPT-sl7        | Clay content (0-2 micro meter) mass fraction              | %              | 35          | 57          | 44.2          | 2.6         |
| CRFVOL-sl1        | Coarse fragments volumetric                               | %              | 12          | 37          | 22.9          | 3.1         |
| CRFVOL-sl2        | Coarse fragments volumetric                               | %              | 13          | 35          | 22.0          | 2.9         |
| <b>CRFVOL-sl3</b> | <b>Coarse fragments volumetric</b>                        | <b>%</b>       | <b>14</b>   | <b>36</b>   | <b>23.2</b>   | <b>3.0</b>  |
| CRFVOL-sl4        | Coarse fragments volumetric                               | %              | 15          | 37          | 24.3          | 3.0         |
| CRFVOL-sl5        | Coarse fragments volumetric                               | %              | 16          | 39          | 25.6          | 3.0         |
| CRFVOL-sl6        | Coarse fragments volumetric                               | %              | 18          | 41          | 26.9          | 3.0         |
| CRFVOL-sl7        | Coarse fragments volumetric                               | %              | 18          | 41          | 28.0          | 2.9         |
| OCSTHA-sd1        | Soil organic carbon stock                                 | t ha           | 0           | 60          | 13.7          | 11.2        |
| OCSTHA-sd2        | Soil organic carbon stock                                 | t ha           | 0           | 94          | 14.0          | 11.6        |
| OCSTHA-sd3        | Soil organic carbon stock                                 | t ha           | 0           | 133         | 12.9          | 11.2        |
| OCSTHA-sd4        | Soil organic carbon stock                                 | t ha           | 0           | 273         | 15.5          | 15.5        |

NOTE: Variables in bold were selected for the *P. durangensis* distribution model.

Supplementary Table S10b. Descriptive statistics of the soil variables implemented in the *Pinus durangensis* distribution model; SD= standard deviation.

| Abbreviation      | Variable                                          | Unit       | Min       | Max       | Mean        | SD         |
|-------------------|---------------------------------------------------|------------|-----------|-----------|-------------|------------|
| OCSTHA-sd5        | Soil organic carbon stock                         | t ha       | 0         | 366       | 5.4         | 8.9        |
| OCSTHA-sd6        | Soil organic carbon stock                         | t ha       | 0         | 160       | 0.3         | 3.5        |
| ORCDRC-sl1        | Soil organic carbon content (fine earth fraction) | g kg       | 17        | 152       | 58.0        | 18.0       |
| ORCDRC-sl2        | Soil organic carbon content (fine earth fraction) | g kg       | 10        | 113       | 27.1        | 8.0        |
| ORCDRC-sl3        | Soil organic carbon content (fine earth fraction) | g kg       | 9         | 94        | 17.8        | 4.4        |
| ORCDRC-sl4        | Soil organic carbon content (fine earth fraction) | g kg       | 4         | 92        | 10.2        | 3.4        |
| ORCDRC-sl5        | Soil organic carbon content (fine earth fraction) | g kg       | 2         | 88        | 7.4         | 2.9        |
| ORCDRC-sl6        | Soil organic carbon content (fine earth fraction) | g kg       | 1         | 89        | 6.7         | 2.8        |
| ORCDRC-sl7        | Soil organic carbon content (fine earth fraction) | g kg       | 1         | 89        | 6.7         | 2.8        |
| PHIHOX-sl1        | Soil pH x 10                                      | H2O        | 51        | 72        | 60.5        | 3.0        |
| PHIHOX-sl2        | Soil pH x 10                                      | H2O        | 51        | 72        | 60.1        | 3.1        |
| PHIHOX-sl3        | Soil pH x 10                                      | H2O        | 51        | 73        | 60.1        | 3.1        |
| <b>PHIHOX-sl4</b> | <b>Soil pH x 10</b>                               | <b>H2O</b> | <b>52</b> | <b>74</b> | <b>60.5</b> | <b>3.1</b> |
| PHIHOX-sl5        | Soil pH x 10                                      | H2O        | 53        | 76        | 61.2        | 3.4        |
| PHIHOX-sl6        | Soil pH x 10                                      | H2O        | 53        | 77        | 62.7        | 3.6        |
| PHIHOX-sl7        | Soil pH x 10                                      | H2O        | 53        | 78        | 63.2        | 3.5        |
| PHIKCL-sl1        | Soil pH x 10                                      | KCl        | 41        | 67        | 53.7        | 5.0        |
| PHIKCL-sl2        | Soil pH x 10                                      | KCl        | 41        | 67        | 53.7        | 4.9        |
| PHIKCL-sl3        | Soil pH x 10                                      | KCl        | 42        | 67        | 53.5        | 4.7        |
| PHIKCL-sl4        | Soil pH x 10                                      | KCl        | 44        | 67        | 53.6        | 4.6        |
| PHIKCL-sl5        | Soil pH x 10                                      | KCl        | 44        | 68        | 54.1        | 4.5        |
| PHIKCL-sl6        | Soil pH x 10                                      | KCl        | 45        | 68        | 54.4        | 4.4        |
| PHIKCL-sl7        | Soil pH x 10                                      | KCl        | 45        | 69        | 54.8        | 4.5        |
| SLTPPT-sl1        | Silt content (2-50 micro meter)                   | %          | 18        | 36        | 26.1        | 2.8        |
| SLTPPT-sl2        | Silt content (2-50 micro meter)                   | %          | 18        | 37        | 26.3        | 2.8        |
| SLTPPT-sl3        | Silt content (2-50 micro meter)                   | %          | 18        | 36        | 26.0        | 2.8        |
| <b>SLTPPT-sl4</b> | <b>Silt content (2-50 micro meter)</b>            | <b>%</b>   | <b>17</b> | <b>35</b> | <b>25.3</b> | <b>2.8</b> |
| SLTPPT-sl5        | Silt content (2-50 micro meter)                   | %          | 17        | 32        | 24.6        | 2.5        |
| SLTPPT-sl6        | Silt content (2-50 micro meter)                   | %          | 16        | 31        | 24.0        | 2.4        |
| SLTPPT-sl7        | Silt content (2-50 micro meter)                   | %          | 17        | 30        | 23.9        | 2.2        |
| <b>SNDPPT-sl1</b> | <b>Sand content (50-2000 micro meter)</b>         | <b>%</b>   | <b>19</b> | <b>36</b> | <b>26.9</b> | <b>2.1</b> |
| SNDPPT-sl2        | Sand content (50-2000 micro meter)                | %          | 20        | 37        | 26.5        | 2.3        |
| SNDPPT-sl3        | Sand content (50-2000 micro meter)                | %          | 20        | 40        | 27.1        | 2.6        |
| SNDPPT-sl4        | Sand content (50-2000 micro meter)                | %          | 20        | 42        | 28.8        | 2.8        |
| SNDPPT-sl5        | Sand content (50-2000 micro meter)                | %          | 21        | 42        | 30.2        | 2.7        |
| SNDPPT-sl6        | Sand content (50-2000 micro meter)                | %          | 21        | 42        | 31.1        | 2.7        |
| SNDPPT-sl7        | Sand content (50-2000 micro meter)                | %          | 22        | 42        | 32.1        | 2.4        |

NOTE: Variables in bold were selected for the *P. durangensis* distribution model.

Supplementary Table S11. Statistical description of the relative frequency of the AFLP used in the models.

| AFLP | Min  | Max  |
|------|------|------|
| 351  | 0.37 | 1    |
| 240  | 0    | 0.71 |
| 416  | 0    | 0.74 |

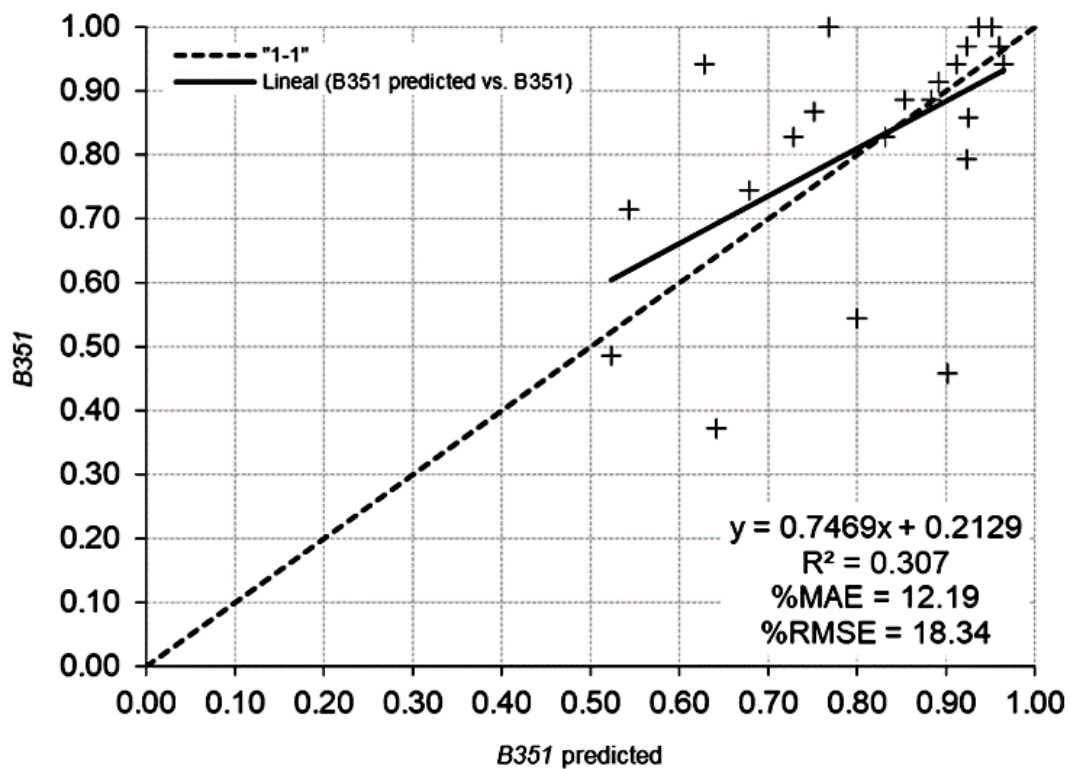

Supplementary Figure S1. Graphical representation of predicted values vs observed values for the adaptive AFLP relative frequency distribution model 351, depending on Spring precipitation (mm), for *Pinus arizonica*.

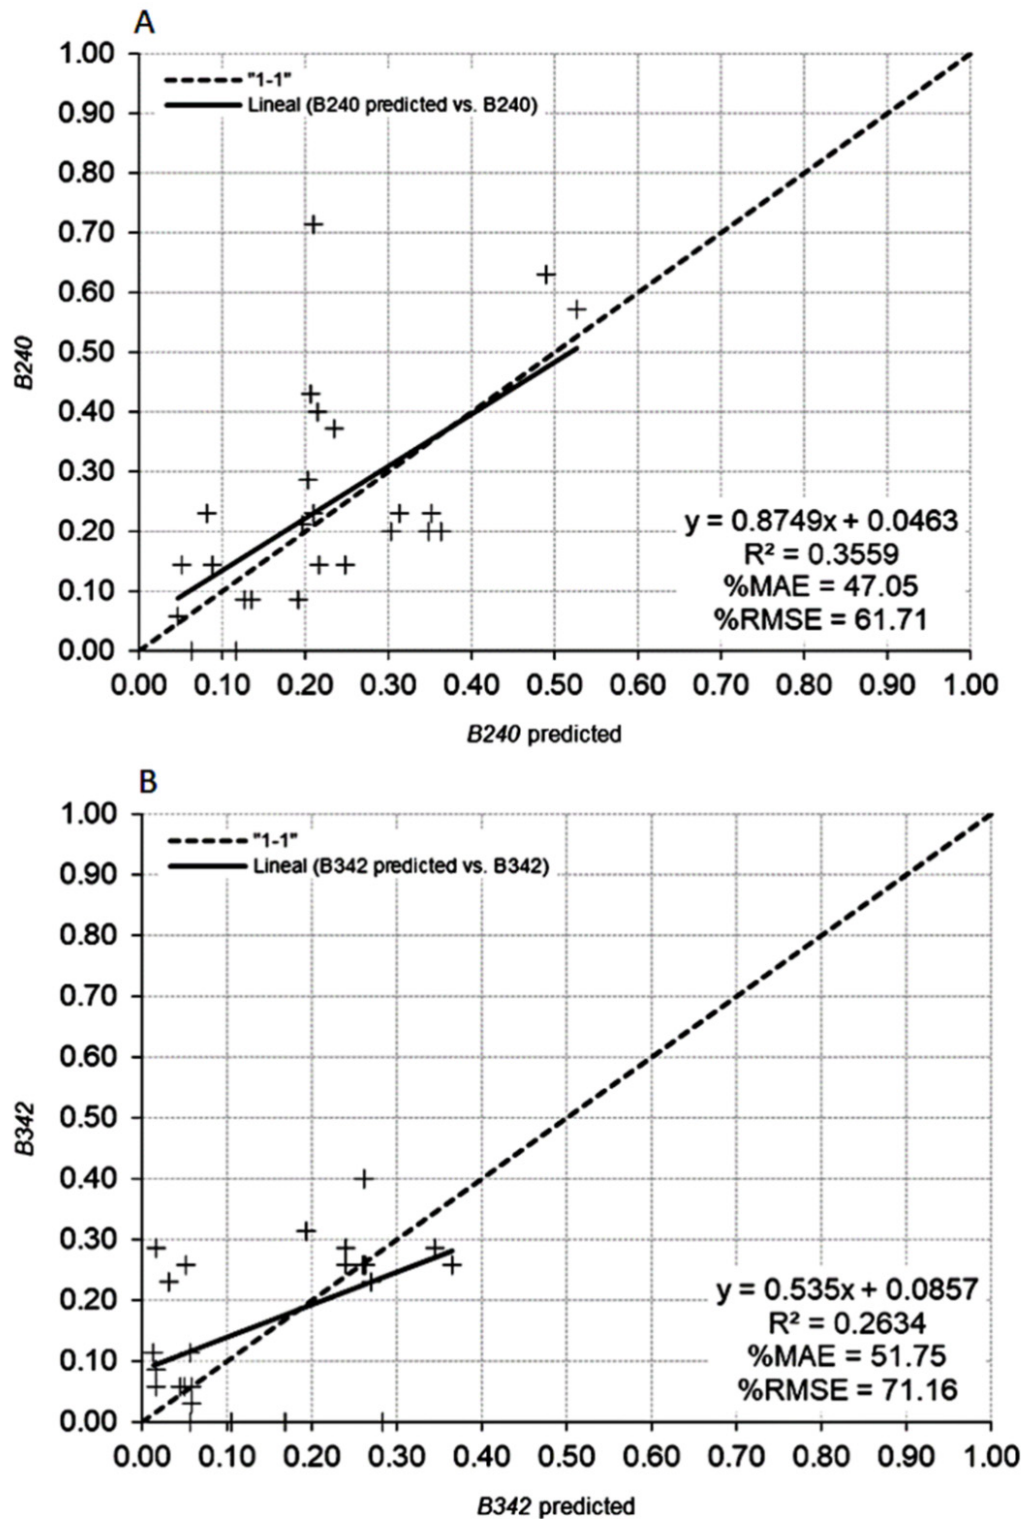

Supplementary Figure S2. Graphic representation of predicted values vs observed values for the distribution model of *P. durangensis*, A: relative frequency of adaptive AFLP 240 depending on the winter precipitation and B: relative frequency of adaptive AFLP 342 depending on the maximum temperature in the warmest month.

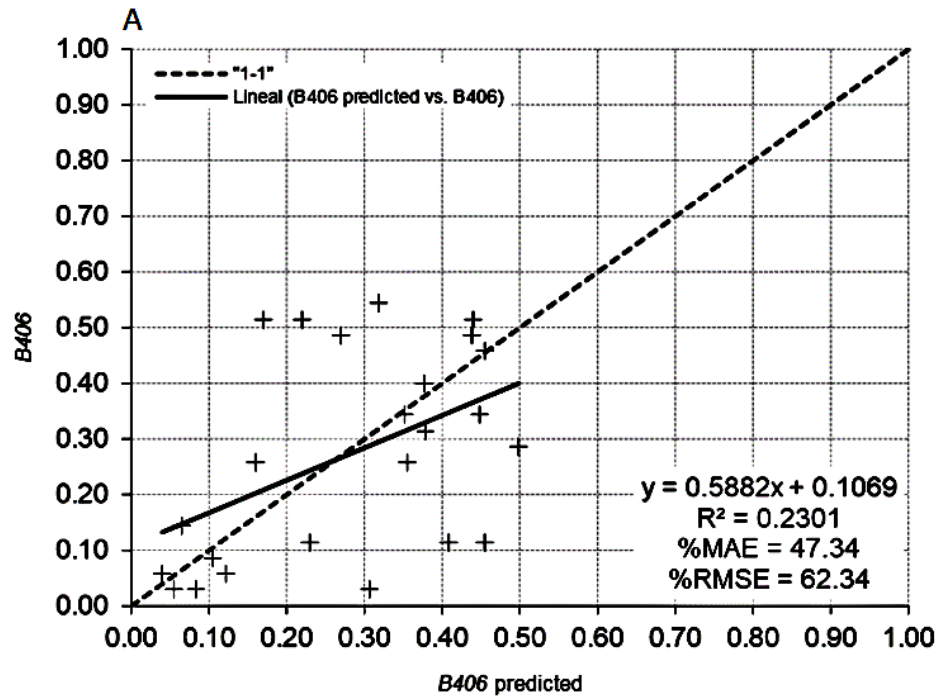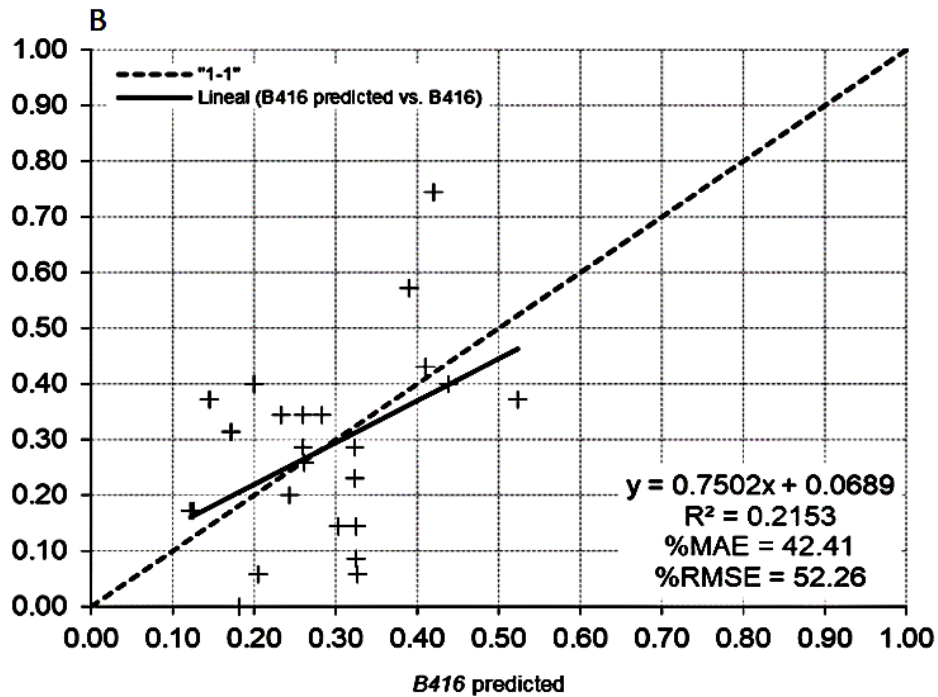

Supplementary Figure S3. Graphical representation of predicted values vs observed values for the distribution model of *P. durangensis*, A: relative frequency of adaptive AFLP 406 depending on the aridity index and B: relative frequency of adaptive AFLP 416 depending on Spring precipitation (mm).

Supplementary Table S12. Results of RDA analysis and variance partitioning for *Pinus arizonica*.

| Partition            | R.squared | Adj.R.squared |
|----------------------|-----------|---------------|
| [a+b] = X1           | 0.095     | 0.0552        |
| [b+c] = X2           | 0.251     | 0.144         |
| [a+b+c] = X1+X2      | 0.322     | 0.187         |
| Individual fractions |           |               |
| [a] = X1   X2        |           | 0.042         |
| [b]                  |           | 0.013         |
| [c] = X2   X1        |           | 0.132         |
| [d] = Residuals      |           | 0.813         |

NOTE: X1= soil variables and X2 = climatic variables.

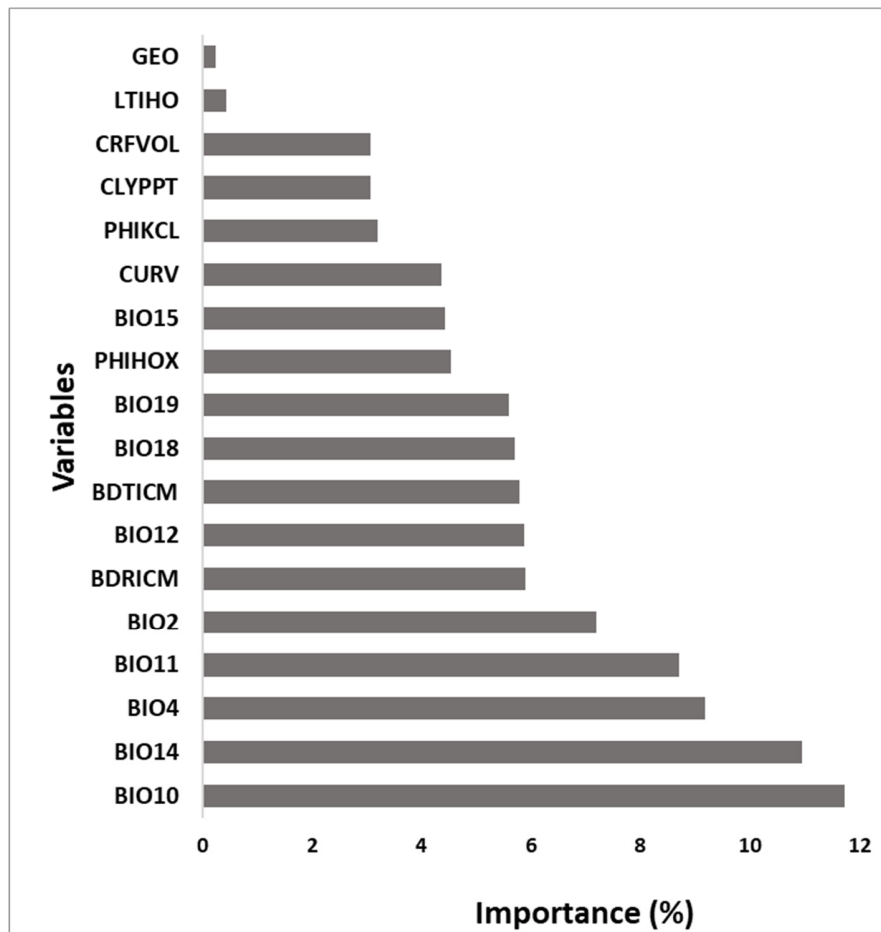

Supplementary Figure S4. Important variables for the *Pinus arizonica* distribution model selected by partial least squares (PLS) and the random forest algorithm.

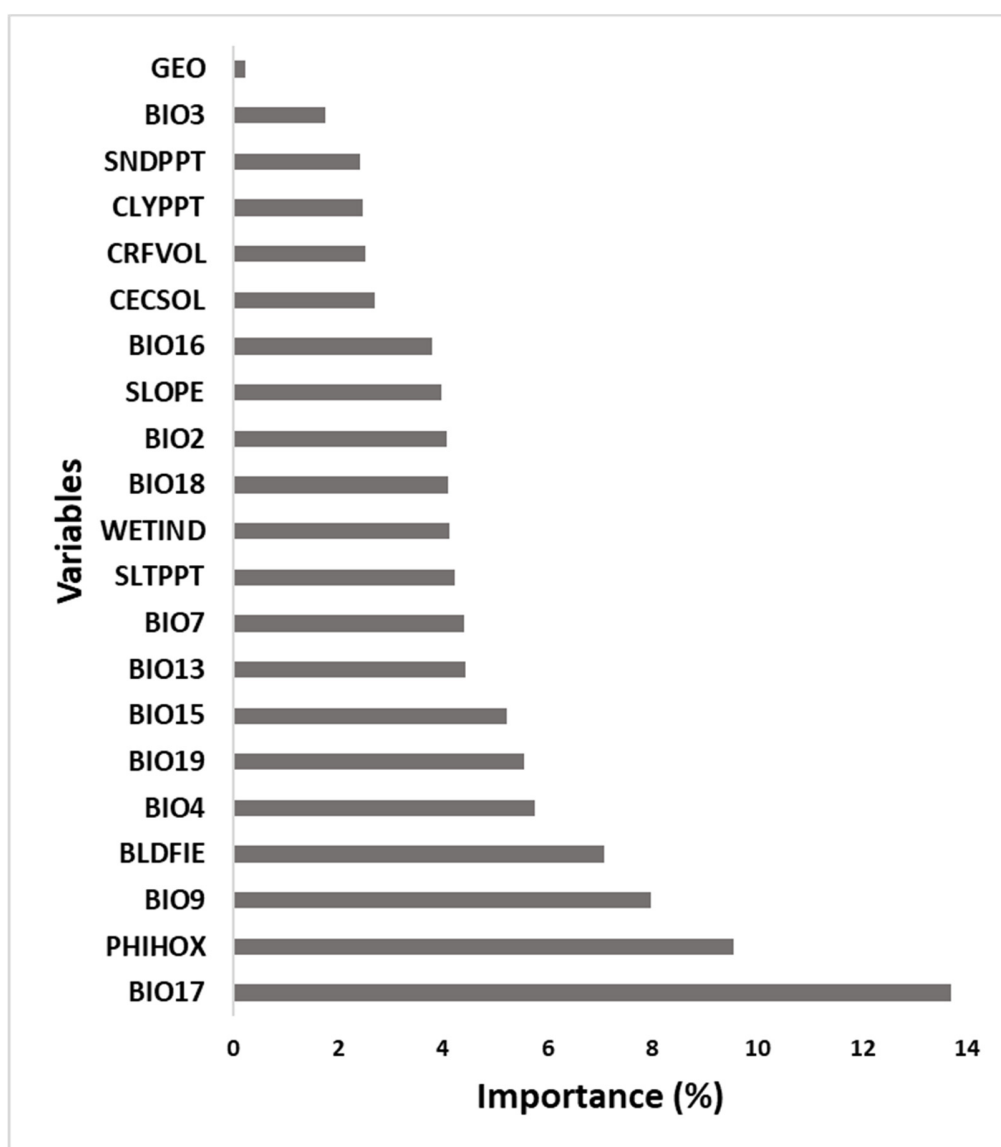

Supplementary Figure S5. Important variables for the *Pinus durangensis* distribution model selected by partial least squares (PLS) and the random forest algorithm.



Supplementary Table S13. Comparison between seed zone sizes estimated with species distribution models (SDM) and areas reported in forest management programs (FMP) for *Pinus arizonica* and *P. durangensis*. Values only for a portion of their southern (S), central (C) and northern (N) distribution regions.

| Cover area (ha) estimated by the species distribution model (SDM) |                            |         |         |         | Data from the forest management programs (FMP) | Difference between SDM and FMP in 2019 (%) |
|-------------------------------------------------------------------|----------------------------|---------|---------|---------|------------------------------------------------|--------------------------------------------|
| <i>P. arizonica</i>                                               | UMAFOR (U) and Ejidos (E)* | 1990    | 2019    | 2030    | 2019                                           |                                            |
|                                                                   | U 1005                     | 95,202  | 50,238  | 28,588  | 54,000                                         | -7.0                                       |
|                                                                   | E. Chiqueros               | 5,135   | 5,084   | 5,065   | 7,047                                          | -27.9                                      |
|                                                                   | E. El Zorrillo             | 5,759   | 4,552   | 4,094   | 6,172                                          | -26.2                                      |
|                                                                   | E. Ciénega Prieta          | 1,318   | 966.2   | 833     | 11                                             | 8603.6                                     |
|                                                                   | E. Cañada Verde            | 3,678   | 2,923   | 2,637   | 3,115                                          | -6.2                                       |
|                                                                   | E. EL Largo                | 54,679  | 20,319  | 7,286   | 22,154                                         | -8.3                                       |
|                                                                   | La Norteña                 | 2,845   | 883     | 139     | 658                                            | 34.1                                       |
|                                                                   | E. El Oso                  | 1,388   | 834     | 625     | 252                                            | 231.4                                      |
|                                                                   | E. Socorro                 | 208     | 108     | 69      | 100                                            | 7.9                                        |
| Sum                                                               |                            | 170,212 | 84,941  | 49,336  | 93,509                                         |                                            |
| Mean                                                              |                            | 18,912  | 10,618  | 5,482   | 10,390                                         | 2.2                                        |
| <i>P. durangensis</i>                                             | U 1005                     | 218,228 | 191,671 | 178,885 | 226,000                                        | -15.2                                      |
|                                                                   | U 1010                     | 126,843 | 101,639 | 92,079  | 99,979                                         | 1.7                                        |
|                                                                   | E. El Largo                | 173,819 | 162,500 | 158,207 | 72,740                                         | 123.4                                      |
|                                                                   | E. La Norteña              | 6,037   | 5,886   | 5,829   | 2,889                                          | 103.7                                      |
|                                                                   | E. El Oso                  | 5,204   | 4,500   | 4,233   | 1,760                                          | 155.7                                      |
| Sum                                                               |                            | 530,131 | 466,196 | 439,233 | 403,368                                        |                                            |
| Mean                                                              |                            | 106,026 | 93,239  | 87,846  | 80,674                                         | 15.6                                       |

\*Note: UMAFOR = Regional forest management unit; Ejidos = Mexican communal type of land property. (UMAFORES 0802, 1001, 1005 and 1010 data were obtained from the following sources: Ramos et al., 2015; Rodríguez, 2017; Rodríguez, 2019; Unión de Permisarios de la Unidad de Administración Forestal La Flor Durango A. C. 2019 and Unidad de Administración Forestal Santiago Papasquiaro A.C. 2019).

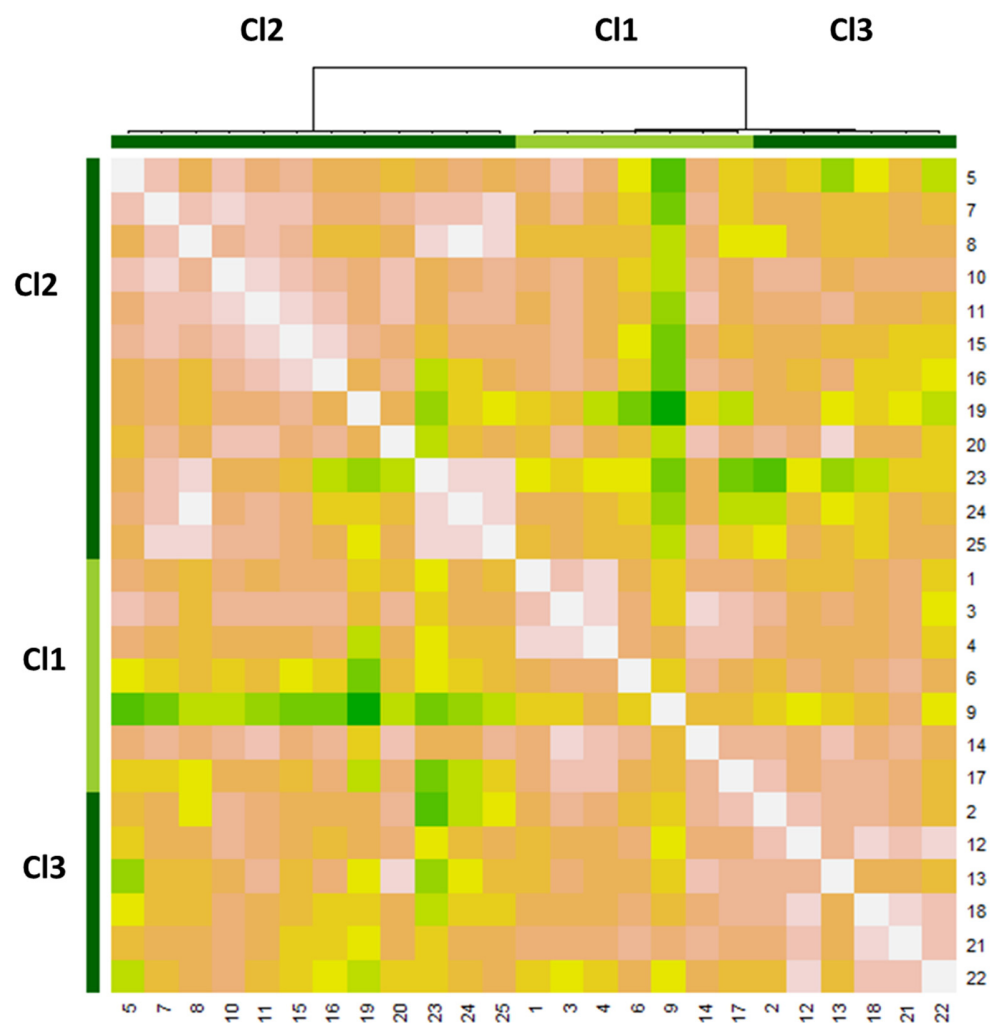

Supplementary Figure S6. Three clusters (CI) of *Pinus arizonica* seed stands. Heat map to visualize the data and to identify clusters of similar environmental conditions based on the Affinity Propagation (AP) clustering, with the quantile = 0.01. This analysis indicates that the 25 stands can be subdivided into three clusters displayed as bright orange squares across the diagonal. The stand's number is shown in Table S3a.

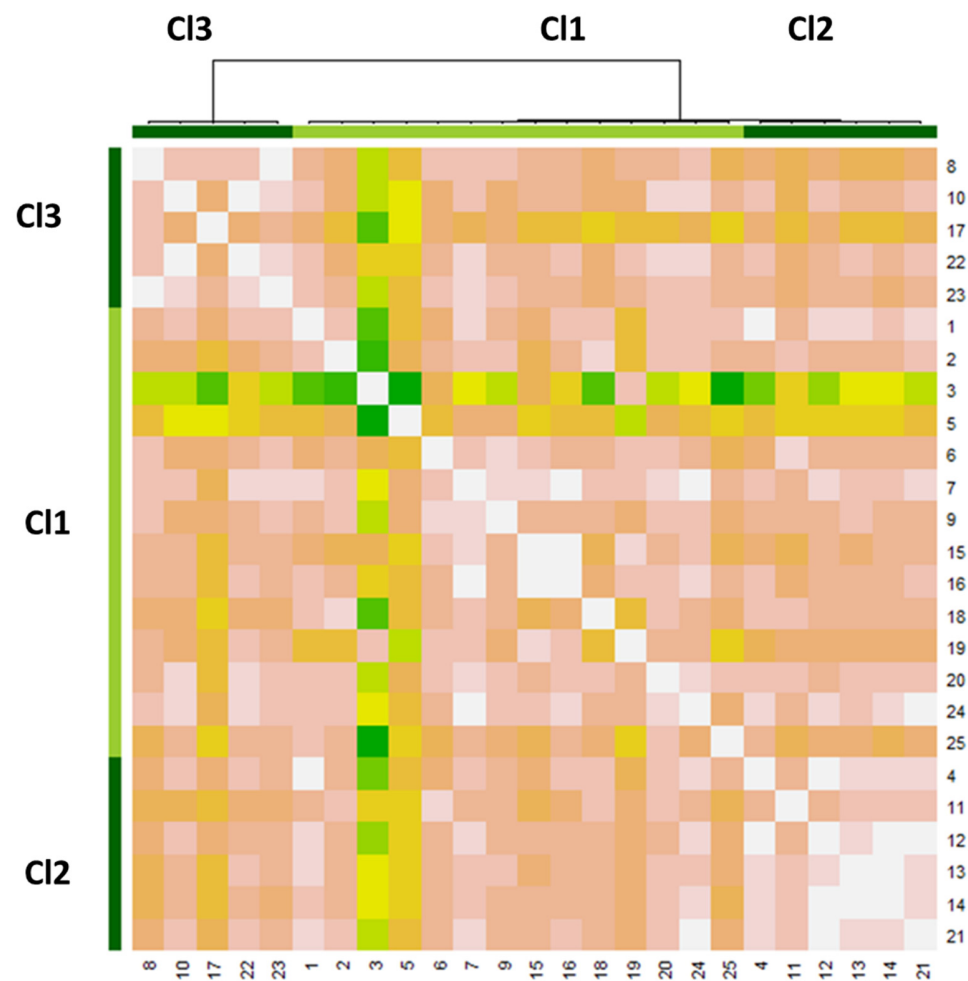

Supplementary Figure S7. Three clusters (CI) of *Pinus durangensis* stands. (A) Heat map to visualize the data and to identify clusters of similar environmental conditions based on the Affinity Propagation (AP) clustering, with the quantile = 0.2. This analysis indicates that the 25 stands can be subdivided into three clusters displayed as bright orange squares across the diagonal. The stand's number is shown in Table S3b.

Supplementary Table S14. Pair-wise *PhiPT* values of *Pinus arizonica* of three clusters of similar climate and soil conditions using the 376 AFLP and the outlier loci by AFLP.

|              |           | Cluster 1 | Cluster 2 | Cluster 3 |
|--------------|-----------|-----------|-----------|-----------|
| all AFLP     | Cluster 1 | 0.000     | 0.003     | 0.462     |
|              | Cluster 2 | 0.002     | 0.000     | 0.164     |
|              | Cluster 3 | 0.000     | 0.001     | 0.000     |
| AFLP outlier | Cluster 1 | 0.000     | 0.011     | 0.010     |
|              | Cluster 2 | 0.004     | 0.000     | 0.457     |
|              | Cluster 3 | 0.004     | 0.000     | 0.000     |

*PhiPT* values above the diagonal. Probability,  $P(\text{rand} \geq \text{data})$  based on 9999 permutations is shown below the diagonal.

Supplementary Table S15. Pair-wise *PhiPT* values of *Pinus arizonica* seed stands in Cluster 1 of similar climate and soil conditions using the 376 AFLP and the outlier loci by AFLP.

|              |     | AG    | AIC   | AM    | BT    | ET    | PA    | PA3   |
|--------------|-----|-------|-------|-------|-------|-------|-------|-------|
| all AFLP     | AG  | 0.000 | 0.425 | 0.382 | 0.381 | 0.427 | 0.230 | 0.040 |
|              | AIC | 0.000 | 0.000 | 0.151 | 0.432 | 0.507 | 0.212 | 0.005 |
|              | AM  | 0.002 | 0.008 | 0.000 | 0.288 | 0.115 | 0.433 | 0.105 |
|              | BT  | 0.002 | 0.000 | 0.004 | 0.000 | 0.136 | 0.252 | 0.013 |
|              | ET  | 0.001 | 0.000 | 0.009 | 0.008 | 0.000 | 0.335 | 0.436 |
|              | PA  | 0.005 | 0.006 | 0.000 | 0.005 | 0.004 | 0.000 | 0.168 |
|              | PA3 | 0.011 | 0.019 | 0.010 | 0.018 | 0.000 | 0.008 | 0.000 |
| AFLP outlier | AG  | 0.000 | 0.331 | 0.425 | 0.473 | 0.001 | 0.437 | 0.013 |
|              | AIC | 0.004 | 0.000 | 0.459 | 0.462 | 0.037 | 0.439 | 0.060 |
|              | AM  | 0.000 | 0.000 | 0.000 | 0.444 | 0.005 | 0.440 | 0.010 |
|              | BT  | 0.000 | 0.000 | 0.000 | 0.000 | 0.011 | 0.453 | 0.020 |
|              | ET  | 0.041 | 0.024 | 0.039 | 0.030 | 0.000 | 0.034 | 0.451 |
|              | PA  | 0.000 | 0.000 | 0.001 | 0.000 | 0.025 | 0.000 | 0.072 |
|              | PA3 | 0.026 | 0.020 | 0.032 | 0.025 | 0.000 | 0.019 | 0.000 |

*PhiPT* values above the diagonal. Probability,  $P(\text{rand} \geq \text{data})$  based on 9999 permutations is shown below the diagonal.

Supplementary Table S16. Pair-wise *PhiPT* values of *Pinus arizonica* seed stands in Cluster 2 of similar climate and soil conditions using the 376 AFLP and the outlier loci by AFLP.

|              |     | AO    | CA    | CA1   | J1    | J3    | PA1   | PA2   | PB    | PC1   | TC    | TG    | XX    |
|--------------|-----|-------|-------|-------|-------|-------|-------|-------|-------|-------|-------|-------|-------|
| all AFLP     | AO  | 0.000 | 0.282 | 0.457 | 0.475 | 0.208 | 0.467 | 0.089 | 0.259 | 0.000 | 0.451 | 0.401 | 0.460 |
|              | CA  | 0.004 | 0.000 | 0.491 | 0.114 | 0.437 | 0.452 | 0.355 | 0.440 | 0.000 | 0.206 | 0.397 | 0.431 |
|              | CA1 | 0.000 | 0.000 | 0.000 | 0.428 | 0.222 | 0.412 | 0.481 | 0.502 | 0.000 | 0.490 | 0.468 | 0.492 |
|              | J1  | 0.000 | 0.009 | 0.002 | 0.000 | 0.367 | 0.438 | 0.162 | 0.473 | 0.000 | 0.469 | 0.439 | 0.512 |
|              | J3  | 0.005 | 0.001 | 0.006 | 0.003 | 0.000 | 0.443 | 0.067 | 0.423 | 0.000 | 0.034 | 0.421 | 0.264 |
|              | PA1 | 0.000 | 0.000 | 0.000 | 0.001 | 0.001 | 0.000 | 0.480 | 0.461 | 0.000 | 0.339 | 0.486 | 0.331 |
|              | PA2 | 0.010 | 0.003 | 0.000 | 0.008 | 0.014 | 0.000 | 0.000 | 0.432 | 0.000 | 0.181 | 0.040 | 0.060 |
|              | PB  | 0.004 | 0.001 | 0.000 | 0.001 | 0.000 | 0.000 | 0.001 | 0.000 | 0.000 | 0.263 | 0.464 | 0.411 |
|              | PC1 | 0.035 | 0.041 | 0.026 | 0.032 | 0.042 | 0.033 | 0.045 | 0.037 | 0.000 | 0.000 | 0.000 | 0.000 |
|              | TC  | 0.000 | 0.007 | 0.000 | 0.001 | 0.016 | 0.003 | 0.008 | 0.005 | 0.042 | 0.000 | 0.146 | 0.283 |
|              | TG  | 0.001 | 0.002 | 0.000 | 0.001 | 0.001 | 0.000 | 0.018 | 0.000 | 0.048 | 0.010 | 0.000 | 0.459 |
|              | XX  | 0.000 | 0.000 | 0.000 | 0.000 | 0.005 | 0.003 | 0.014 | 0.002 | 0.041 | 0.005 | 0.001 | 0.000 |
| AFLP outlier | AO  | 0.000 | 0.177 | 0.435 | 0.401 | 0.141 | 0.118 | 0.426 | 0.050 | 0.000 | 0.165 | 0.092 | 0.418 |
|              | CA  | 0.010 | 0.000 | 0.457 | 0.329 | 0.441 | 0.412 | 0.315 | 0.400 | 0.000 | 0.423 | 0.432 | 0.416 |
|              | CA1 | 0.000 | 0.000 | 0.000 | 0.193 | 0.211 | 0.268 | 0.280 | 0.173 | 0.000 | 0.455 | 0.410 | 0.428 |
|              | J1  | 0.001 | 0.005 | 0.010 | 0.000 | 0.439 | 0.445 | 0.263 | 0.448 | 0.000 | 0.064 | 0.018 | 0.441 |
|              | J3  | 0.013 | 0.000 | 0.010 | 0.000 | 0.000 | 0.424 | 0.398 | 0.467 | 0.000 | 0.155 | 0.065 | 0.433 |
|              | PA1 | 0.014 | 0.000 | 0.007 | 0.000 | 0.000 | 0.000 | 0.314 | 0.380 | 0.000 | 0.236 | 0.035 | 0.401 |
|              | PA2 | 0.000 | 0.005 | 0.007 | 0.007 | 0.003 | 0.005 | 0.000 | 0.110 | 0.000 | 0.256 | 0.353 | 0.395 |
|              | PB  | 0.020 | 0.002 | 0.011 | 0.000 | 0.000 | 0.003 | 0.016 | 0.000 | 0.000 | 0.143 | 0.019 | 0.473 |
|              | PC1 | 0.093 | 0.102 | 0.078 | 0.083 | 0.103 | 0.104 | 0.107 | 0.076 | 0.000 | 0.000 | 0.000 | 0.000 |
|              | TC  | 0.010 | 0.000 | 0.000 | 0.020 | 0.014 | 0.009 | 0.008 | 0.013 | 0.091 | 0.000 | 0.432 | 0.353 |
|              | TG  | 0.017 | 0.001 | 0.000 | 0.031 | 0.023 | 0.029 | 0.004 | 0.030 | 0.107 | 0.000 | 0.000 | 0.131 |
|              | XX  | 0.000 | 0.000 | 0.000 | 0.000 | 0.000 | 0.000 | 0.003 | 0.000 | 0.102 | 0.004 | 0.016 | 0.000 |

*PhiPT* values above the diagonal. Probability,  $P(\text{rand} \geq \text{data})$  based on 9999 permutations is shown below the diagonal.

Supplementary Table S17. Pair-wise *PhiPT* values of *Pinus arizonica* seed stands in Cluster 3 of similar climate and soil conditions using the 376 AFLP and the outlier loci by AFLP.

|              |      | AGLL  | MC    | MJ    | PACB  | PCT   | PS    |
|--------------|------|-------|-------|-------|-------|-------|-------|
| all AFLP     | AGLL | 0.000 | 0.481 | 0.473 | 0.490 | 0.475 | 0.390 |
|              | MC   | 0.000 | 0.000 | 0.425 | 0.488 | 0.430 | 0.461 |
|              | MJ   | 0.000 | 0.000 | 0.000 | 0.452 | 0.432 | 0.491 |
|              | PACB | 0.000 | 0.000 | 0.000 | 0.000 | 0.467 | 0.458 |
|              | PCT  | 0.000 | 0.000 | 0.000 | 0.000 | 0.000 | 0.274 |
|              | PS   | 0.001 | 0.001 | 0.000 | 0.000 | 0.005 | 0.000 |
| AFLP outlier | AGLL | 0.000 | 0.000 | 0.057 | 0.002 | 0.000 | 0.113 |
|              | MC   | 0.052 | 0.000 | 0.037 | 0.085 | 0.046 | 0.002 |
|              | MJ   | 0.019 | 0.021 | 0.000 | 0.064 | 0.049 | 0.190 |
|              | PACB | 0.048 | 0.018 | 0.019 | 0.000 | 0.327 | 0.050 |
|              | PCT  | 0.072 | 0.023 | 0.022 | 0.004 | 0.000 | 0.007 |
|              | PS   | 0.017 | 0.045 | 0.011 | 0.025 | 0.042 | 0.000 |

*PhiPT* values above the diagonal. Probability,  $P(\text{rand} \geq \text{data})$  based on 9999 permutations is shown below the diagonal.

Supplementary Table S18. Pair-wise *PhiPT* values of *Pinus durangensis* of three clusters of similar climate and soil conditions using the 376 AFLP and the outlier loci by AFLP.

|              |           | Cluster 1 | Cluster 2 | Cluster 3 |
|--------------|-----------|-----------|-----------|-----------|
| all AFLP     | Cluster 1 | 0.000     | 0.212     | 0.450     |
|              | Cluster 2 | 0.001     | 0.000     | 0.327     |
|              | Cluster 3 | 0.000     | 0.000     | 0.000     |
| AFLP outlier | Cluster 1 | 0.000     | 0.448     | 0.012     |
|              | Cluster 2 | 0.000     | 0.000     | 0.445     |
|              | Cluster 3 | 0.004     | 0.000     | 0.000     |

*PhiPT* values above the diagonal. Probability,  $P(\text{rand} \geq \text{data})$  based on 9999 permutations is shown below the diagonal.

Supplementary Table S19. Pair-wise *PhiPT* values of *Pinus durangensis* seed stands in Cluster 1 of similar climate and soil conditions using the 376 AFLP and the outlier loci by AFLP.

|              |     | CC    | CD    | CHD   | DC    | DP    | EG    | H2    | MA    | OC    | PD1   | PD2   | PDC   | PPD   | SMD   |
|--------------|-----|-------|-------|-------|-------|-------|-------|-------|-------|-------|-------|-------|-------|-------|-------|
| all AFLP     | CC  | 0.000 | 0.114 | 0.284 | 0.169 | 0.130 | 0.287 | 0.430 | 0.122 | 0.453 | 0.056 | 0.259 | 0.069 | 0.366 | 0.290 |
|              | CD  | 0.009 | 0.000 | 0.033 | 0.114 | 0.251 | 0.373 | 0.456 | 0.461 | 0.022 | 0.004 | 0.451 | 0.005 | 0.408 | 0.010 |
|              | CHD | 0.004 | 0.015 | 0.000 | 0.253 | 0.422 | 0.430 | 0.330 | 0.212 | 0.435 | 0.014 | 0.441 | 0.030 | 0.230 | 0.469 |
|              | DC  | 0.006 | 0.010 | 0.005 | 0.000 | 0.461 | 0.114 | 0.463 | 0.451 | 0.166 | 0.148 | 0.406 | 0.288 | 0.475 | 0.466 |
|              | DP  | 0.007 | 0.005 | 0.002 | 0.000 | 0.000 | 0.428 | 0.484 | 0.331 | 0.468 | 0.241 | 0.416 | 0.477 | 0.134 | 0.143 |
|              | EG  | 0.004 | 0.003 | 0.000 | 0.010 | 0.002 | 0.000 | 0.493 | 0.456 | 0.444 | 0.001 | 0.495 | 0.027 | 0.474 | 0.120 |
|              | H2  | 0.000 | 0.000 | 0.003 | 0.000 | 0.000 | 0.000 | 0.000 | 0.484 | 0.466 | 0.495 | 0.337 | 0.481 | 0.496 | 0.402 |
|              | MA  | 0.007 | 0.000 | 0.006 | 0.000 | 0.003 | 0.000 | 0.000 | 0.000 | 0.070 | 0.003 | 0.468 | 0.065 | 0.213 | 0.115 |
|              | OC  | 0.000 | 0.016 | 0.000 | 0.007 | 0.000 | 0.000 | 0.000 | 0.010 | 0.000 | 0.012 | 0.458 | 0.018 | 0.143 | 0.370 |
|              | PD1 | 0.013 | 0.024 | 0.020 | 0.009 | 0.005 | 0.029 | 0.000 | 0.020 | 0.019 | 0.000 | 0.014 | 0.197 | 0.050 | 0.018 |
|              | PD2 | 0.005 | 0.001 | 0.000 | 0.001 | 0.000 | 0.000 | 0.003 | 0.000 | 0.000 | 0.019 | 0.000 | 0.132 | 0.491 | 0.249 |
|              | PDC | 0.009 | 0.019 | 0.014 | 0.003 | 0.000 | 0.015 | 0.000 | 0.009 | 0.015 | 0.007 | 0.008 | 0.000 | 0.026 | 0.019 |
|              | PPD | 0.003 | 0.002 | 0.006 | 0.000 | 0.008 | 0.000 | 0.000 | 0.006 | 0.009 | 0.015 | 0.000 | 0.015 | 0.000 | 0.419 |
|              | SMD | 0.005 | 0.022 | 0.000 | 0.000 | 0.009 | 0.011 | 0.002 | 0.009 | 0.003 | 0.021 | 0.005 | 0.018 | 0.000 | 0.000 |
| AFLP outlier | CC  | 0.000 | 0.001 | 0.000 | 0.423 | 0.001 | 0.000 | 0.015 | 0.431 | 0.012 | 0.002 | 0.406 | 0.000 | 0.173 | 0.015 |
|              | CD  | 0.057 | 0.000 | 0.356 | 0.001 | 0.002 | 0.127 | 0.175 | 0.001 | 0.422 | 0.167 | 0.439 | 0.000 | 0.053 | 0.437 |
|              | CHD | 0.055 | 0.004 | 0.000 | 0.001 | 0.015 | 0.068 | 0.450 | 0.004 | 0.410 | 0.445 | 0.244 | 0.000 | 0.111 | 0.305 |
|              | DC  | 0.000 | 0.051 | 0.047 | 0.000 | 0.000 | 0.001 | 0.037 | 0.424 | 0.037 | 0.013 | 0.208 | 0.000 | 0.428 | 0.019 |
|              | DP  | 0.041 | 0.035 | 0.024 | 0.046 | 0.000 | 0.362 | 0.001 | 0.027 | 0.008 | 0.001 | 0.013 | 0.104 | 0.003 | 0.007 |
|              | EG  | 0.045 | 0.014 | 0.018 | 0.042 | 0.003 | 0.000 | 0.011 | 0.103 | 0.429 | 0.123 | 0.150 | 0.000 | 0.048 | 0.153 |
|              | H2  | 0.034 | 0.012 | 0.000 | 0.027 | 0.041 | 0.031 | 0.000 | 0.054 | 0.414 | 0.400 | 0.459 | 0.000 | 0.265 | 0.212 |
|              | MA  | 0.000 | 0.041 | 0.034 | 0.000 | 0.019 | 0.014 | 0.021 | 0.000 | 0.108 | 0.017 | 0.430 | 0.000 | 0.435 | 0.029 |
|              | OC  | 0.031 | 0.000 | 0.000 | 0.025 | 0.026 | 0.001 | 0.000 | 0.014 | 0.000 | 0.435 | 0.411 | 0.000 | 0.461 | 0.421 |
|              | PD1 | 0.045 | 0.012 | 0.000 | 0.034 | 0.034 | 0.014 | 0.002 | 0.027 | 0.000 | 0.000 | 0.336 | 0.000 | 0.194 | 0.428 |
|              | PD2 | 0.002 | 0.000 | 0.008 | 0.009 | 0.024 | 0.011 | 0.000 | 0.000 | 0.000 | 0.004 | 0.000 | 0.000 | 0.471 | 0.417 |
|              | PDC | 0.098 | 0.095 | 0.086 | 0.105 | 0.014 | 0.064 | 0.102 | 0.072 | 0.083 | 0.092 | 0.082 | 0.000 | 0.000 | 0.000 |
|              | PPD | 0.010 | 0.020 | 0.014 | 0.000 | 0.026 | 0.018 | 0.007 | 0.000 | 0.000 | 0.009 | 0.000 | 0.066 | 0.000 | 0.185 |
|              | SMD | 0.031 | 0.000 | 0.005 | 0.029 | 0.028 | 0.012 | 0.009 | 0.024 | 0.002 | 0.000 | 0.000 | 0.084 | 0.010 | 0.000 |

*PhiPT* values above the diagonal. Probability, P(rand >= data) based on 9999 permutations is shown below the diagonal.

Supplementary Table S20. Pair-wise *PhiPT* values of *Pinus durangensis* seed stands in Cluster 2 of similar climate and soil conditions using the 376 AFLP and the outlier loci by AFLP.

|              |     | CM    | LCQ   | LD    | LND   | LP    | PDN   |
|--------------|-----|-------|-------|-------|-------|-------|-------|
| all AFLP     | CM  | 0.000 | 0.000 | 0.003 | 0.002 | 0.011 | 0.454 |
|              | LCQ | 0.022 | 0.000 | 0.463 | 0.414 | 0.270 | 0.000 |
|              | LD  | 0.019 | 0.000 | 0.000 | 0.486 | 0.034 | 0.018 |
|              | LND | 0.020 | 0.002 | 0.000 | 0.000 | 0.149 | 0.007 |
|              | LP  | 0.017 | 0.004 | 0.014 | 0.009 | 0.000 | 0.011 |
|              | PDN | 0.000 | 0.024 | 0.015 | 0.018 | 0.018 | 0.000 |
| AFLP outlier | CM  | 0.000 | 0.000 | 0.000 | 0.004 | 0.000 | 0.428 |
|              | LCQ | 0.057 | 0.000 | 0.451 | 0.459 | 0.282 | 0.000 |
|              | LD  | 0.048 | 0.000 | 0.000 | 0.448 | 0.330 | 0.000 |
|              | LND | 0.029 | 0.000 | 0.000 | 0.000 | 0.066 | 0.004 |
|              | LP  | 0.045 | 0.006 | 0.004 | 0.017 | 0.000 | 0.001 |
|              | PDN | 0.000 | 0.065 | 0.058 | 0.030 | 0.045 | 0.000 |

*PhiPT* values above the diagonal. Probability, P(rand >= data) based on 9999 permutations is shown below the diagonal.

Supplementary Table S21. Pair-wise *PhiPT* values of *Pinus durangensis* seed stands in Cluster 3 of similar climate and soil conditions using the 376 AFLP and the outlier loci by AFLP.

|              |     | ESF   | JP    | PD    | PDS   | PL    |
|--------------|-----|-------|-------|-------|-------|-------|
| all AFLP     | ESF | 0.000 | 0.267 | 0.468 | 0.383 | 0.178 |
|              | JP  | 0.005 | 0.000 | 0.221 | 0.049 | 0.498 |
|              | PD  | 0.000 | 0.006 | 0.000 | 0.422 | 0.448 |
|              | PDS | 0.002 | 0.014 | 0.000 | 0.000 | 0.070 |
|              | PL  | 0.008 | 0.000 | 0.000 | 0.013 | 0.000 |
| AFLP outlier | ESF | 0.000 | 0.420 | 0.068 | 0.347 | 0.071 |
|              | JP  | 0.000 | 0.000 | 0.163 | 0.466 | 0.032 |
|              | PD  | 0.019 | 0.011 | 0.000 | 0.113 | 0.002 |
|              | PDS | 0.004 | 0.000 | 0.014 | 0.000 | 0.101 |
|              | PL  | 0.020 | 0.025 | 0.052 | 0.016 | 0.000 |

*PhiPT* values above the diagonal. Probability, P(rand >= data) based on 9999 permutations is shown below the diagonal.



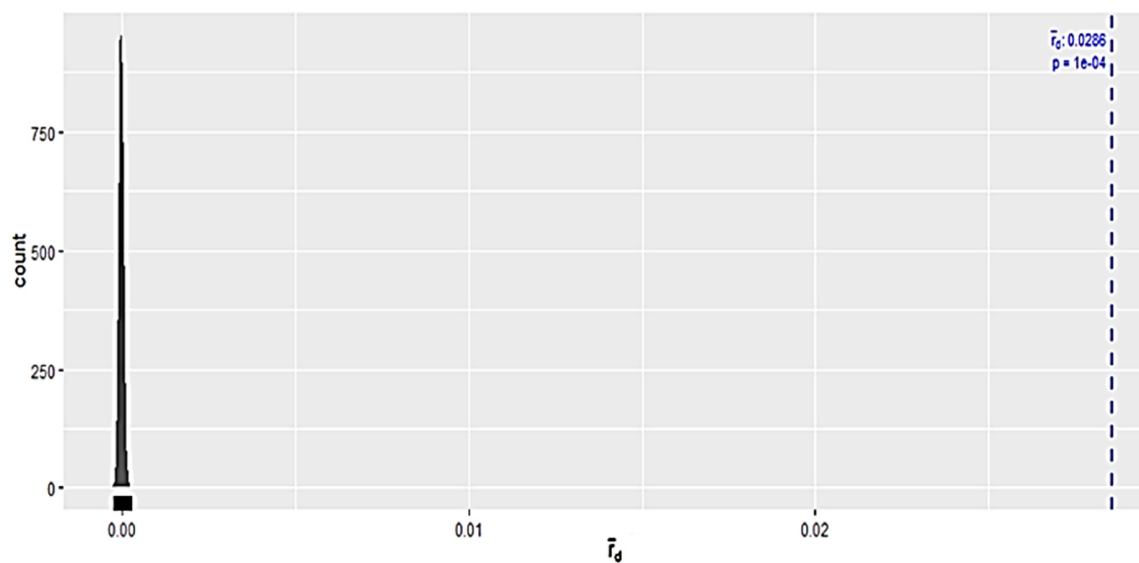

Supplementary Figure S8. Pattern of linkage disequilibrium for the 25 seed stands of *Pinus arizonica*;  $\bar{r}_d$  = value of the Standardized Index of Association that accounts for the number of AFLP loci sampled and  $p$  = p-value for value of the Standardized Index of Association.

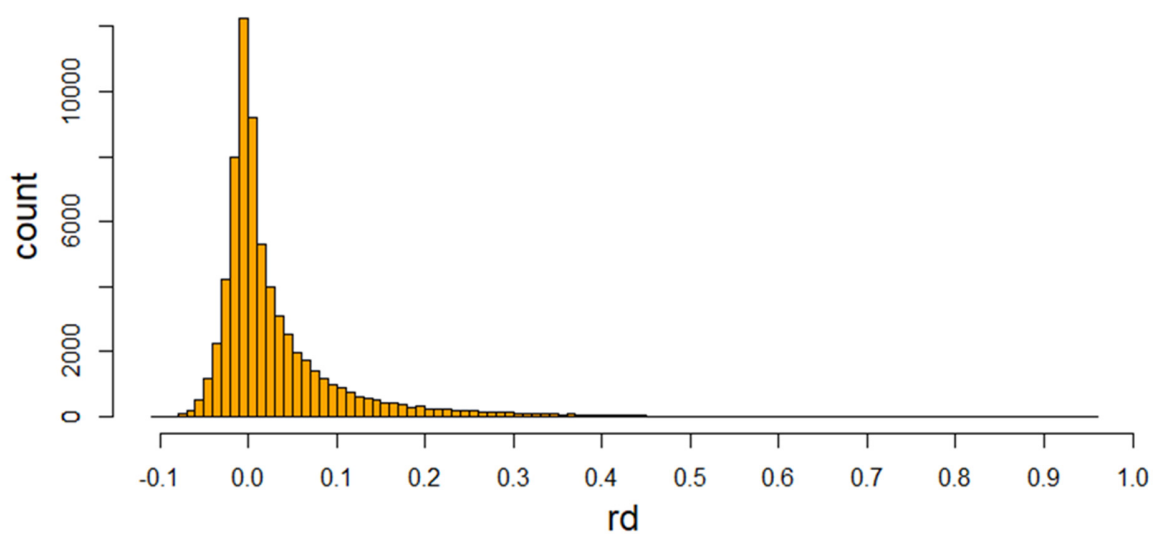

Supplementary Figure S9. Histogram of pairwise values of the Standardized Index of Association ( $r_d$ ) overall loci of *Pinus arizonica*.

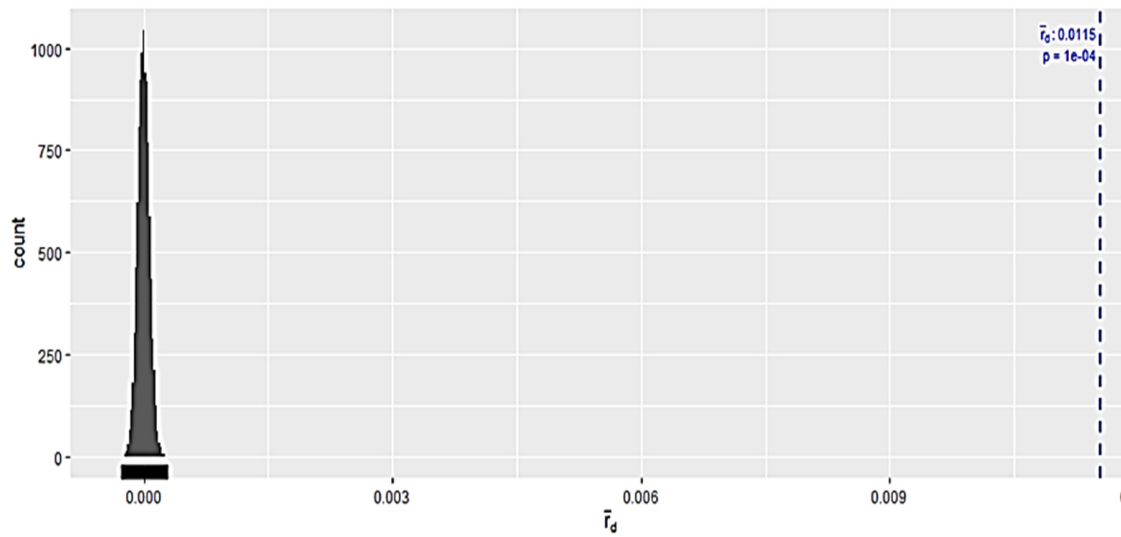

Supplementary Figure S10. Pattern of linkage disequilibrium for the 25 seed stands of *Pinus durangensis*;  $\bar{r}_d$  = value of the Standardized Index of Association that accounts for the number of AFLP loci sampled and  $p$  = p-value for value of the Standardized Index of Association.

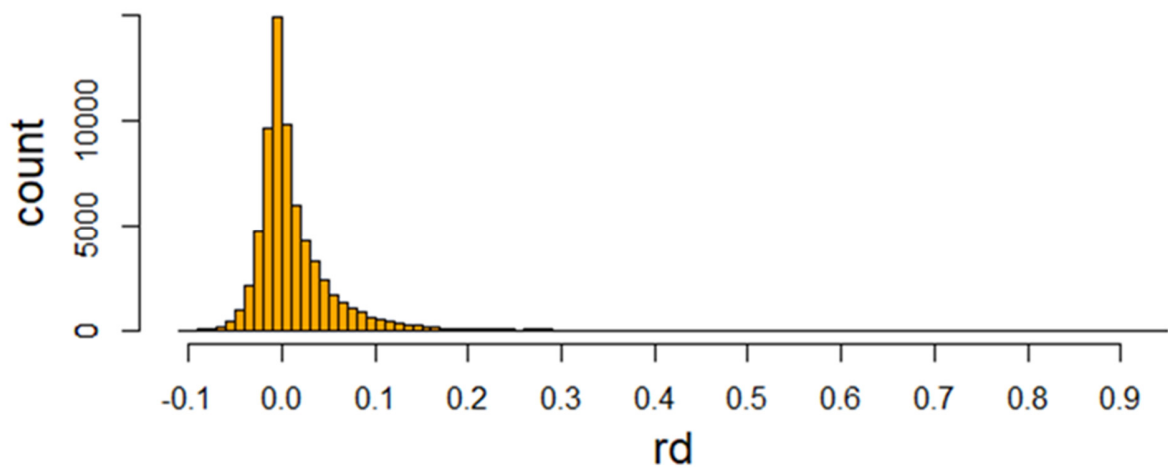

Supplementary Figure S11. Histogram of pairwise values of the Standardized Index of Association ( $r_d$ ) overall loci of *Pinus durangensis*.

Supplementary Table S22. Linkage disequilibrium pattern for the 25 seed stands of *Pinus arizonica* and *Pinus durangensis*, using the 376 AFLP and the outlier loci detected.

| Species                  | AFLP         | Cluster        | $\bar{r}_d$  | p            |
|--------------------------|--------------|----------------|--------------|--------------|
| <i>Pinus arizonica</i>   | all AFLP     | Cluster 1      | 0.019        | 0.001        |
|                          |              | Cluster 2      | 0.039        | 0.001        |
|                          |              | Cluster 3      | 0.008        | 0.001        |
|                          |              | <b>Mean</b>    | <b>0.022</b> | <b>0.001</b> |
|                          |              | <b>Overall</b> | <b>0.029</b> | <b>0.001</b> |
|                          | AFLP outlier | Cluster 1      | 0.044        | 0.001        |
|                          |              | Cluster 2      | 0.073        | 0.001        |
|                          |              | Cluster 3      | 0.042        | 0.001        |
|                          |              | <b>Mean</b>    | <b>0.053</b> | <b>0.001</b> |
|                          |              | <b>Overall</b> | <b>0.055</b> | <b>0.001</b> |
| <i>Pinus durangensis</i> | all AFLP     | Cluster 1      | 0.014        | 0.001        |
|                          |              | Cluster 2      | 0.01         | 0.001        |
|                          |              | Cluster 3      | 0.008        | 0.001        |
|                          |              | <b>Mean</b>    | <b>0.011</b> | <b>0.001</b> |
|                          |              | <b>Overall</b> | <b>0.012</b> | <b>0.001</b> |
|                          | AFLP outlier | Cluster 1      | 0.050        | 0.001        |
|                          |              | Cluster 2      | 0.040        | 0.001        |
|                          |              | Cluster 3      | 0.035        | 0.001        |
|                          |              | <b>Mean</b>    | <b>0.042</b> | <b>0.001</b> |
|                          |              | <b>Overall</b> | <b>0.044</b> | <b>0.001</b> |

$\bar{r}_d$ = value of the Standardized Index of Association that accounts for the number of AFLP loci sampled and p = p-value for value of the Standardized Index of Association.

Supplementary Table S23. Three indices of genetic diversity of the 25 seed stands of *Pinus arizonica* calculated for each cluster of seed stands defined by similar climate and soil conditions (Figure 6) and overall.

| Stands         | DW           | dg           | % Poly       | Cluster |
|----------------|--------------|--------------|--------------|---------|
| AG             | 0.097        | 1.411        | 0.799        | 1       |
| AIC            | 0.074        | 1.3          | 0.693        | 1       |
| AM             | 0.097        | 1.363        | 0.791        | 1       |
| BT             | 0.071        | 1.306        | 0.641        | 1       |
| ET             | 0.079        | 1.291        | 0.671        | 1       |
| PA             | 0.081        | 1.314        | 0.682        | 1       |
| PA3            | 0.109        | 1.33         | 0.728        | 1       |
| <b>Mean</b>    | <b>0.087</b> | <b>1.331</b> | <b>0.715</b> |         |
| AO             | 0.08         | 1.327        | 0.716        | 2       |
| CA             | 0.069        | 1.305        | 0.663        | 2       |
| CA1            | 0.124        | 1.387        | 0.813        | 2       |
| J1             | 0.086        | 1.329        | 0.704        | 2       |
| J3             | 0.116        | 1.332        | 0.772        | 2       |
| PA1            | 0.116        | 1.336        | 0.778        | 2       |
| PA2            | 0.113        | 1.352        | 0.78         | 2       |
| PB             | 0.104        | 1.363        | 0.734        | 2       |
| PC1            | 0.247        | 1.339        | 0.799        | 2       |
| TC             | 0.057        | 1.25         | 0.578        | 2       |
| TG             | 0.082        | 1.314        | 0.682        | 2       |
| XX             | 0.067        | 1.267        | 0.627        | 2       |
| <b>Mean</b>    | <b>0.105</b> | <b>1.325</b> | <b>0.721</b> |         |
| MC             | 0.058        | 1.286        | 0.6          | 3       |
| AGLL           | 0.104        | 1.338        | 0.726        | 3       |
| MJ             | 0.076        | 1.31         | 0.695        | 3       |
| PACB           | 0.082        | 1.303        | 0.698        | 3       |
| PCT            | 0.071        | 1.278        | 0.627        | 3       |
| PS             | 0.09         | 1.328        | 0.726        | 3       |
| <b>Mean</b>    | <b>0.080</b> | <b>1.307</b> | <b>0.679</b> |         |
| <b>Overall</b> | <b>0.094</b> | <b>1.322</b> | <b>0.709</b> |         |

NOTE: DW, low weighted frequency marker value; dg, mean genetic diversity; %Poly, percent polymorphism; no statistically significant difference.

Supplementary Table S24. Three indices of genetic diversity of the 25 seed stands of *Pinus durangensis* calculated for each cluster of seed stands defined by similar climate and soil conditions (Figure 7) and overall.

| Stands         | DW           | dg           | % Poly       | Cluster |
|----------------|--------------|--------------|--------------|---------|
| CC             | 0.097        | 1.325        | 0.756        | 1       |
| CD             | 0.095        | 1.310        | 0.720        | 1       |
| CHD            | 0.093        | 1.334        | 0.761        | 1       |
| DC             | 0.128        | 1.350        | 0.810        | 1       |
| DP             | 0.073        | 1.339        | 0.726        | 1       |
| EG             | 0.075        | 1.303        | 0.687        | 1       |
| H2             | 0.108        | 1.342        | 0.761        | 1       |
| MA             | 0.124        | 1.414        | 0.873        | 1       |
| OC             | 0.088        | 1.320        | 0.701        | 1       |
| PD1            | 0.121        | 1.334        | 0.778        | 1       |
| PD2            | 0.107        | 1.362        | 0.778        | 1       |
| PDC            | 0.043        | 1.257        | 0.570        | 1       |
| PPD            | 0.096        | 1.367        | 0.797        | 1       |
| SMD            | 0.092        | 1.317        | 0.717        | 1       |
| <b>Mean</b>    | <b>0.096</b> | <b>1.334</b> | <b>0.745</b> |         |
| CM             | 0.077        | 1.314        | 0.654        | 2       |
| LCQ            | 0.132        | 1.367        | 0.816        | 2       |
| LD             | 0.102        | 1.328        | 0.731        | 2       |
| LND            | 0.097        | 1.343        | 0.723        | 2       |
| LP             | 0.077        | 1.310        | 0.704        | 2       |
| PDN            | 0.065        | 1.289        | 0.679        | 2       |
| <b>Mean</b>    | <b>0.092</b> | <b>1.325</b> | <b>0.718</b> |         |
| ESF            | 0.080        | 1.279        | 0.679        | 3       |
| JP             | 0.085        | 1.320        | 0.723        | 3       |
| PD             | 0.107        | 1.307        | 0.701        | 3       |
| PDS            | 0.090        | 1.328        | 0.712        | 3       |
| PL             | 0.105        | 1.320        | 0.753        | 3       |
| <b>Mean</b>    | <b>0.093</b> | <b>1.311</b> | <b>0.714</b> |         |
| <b>Overall</b> | <b>0.094</b> | <b>1.327</b> | <b>0.732</b> |         |

NOTE: DW, low weighted frequency marker value; dg, mean genetic diversity; %Poly, percent polymorphism; no statistically significant difference.
